# Supplementary material for: Investigations into the effects and related upstream/downstream regulatory mechanisms of long non-coding RNA WT1-AS in the maintenance and development of gastric cancer stem cells in vitro and in vivo
Source: Research Square preprint supplement (doi:10.21203/rs.3.rs-324055/v1), 2021-04-02
Supplement: Supplementary file 1 [file 4da84d1d9ffa3277359b77de.xlsx]

## Sheet: notes
KEGG enrichment analysis for differentially expressed gens in AS_OV versus NC group

## Sheet: Sheet1
PathwayID	Pathway	Level1	Level2	Up_number	Down_number	DEG_number	total_number	Pvalue	FDR	Up_gene	Down_gene	合并Up_gene信息	合并Down_gene信息	URL
hsa00260	Glycine, serine and threonine metabolism	Metabolism	Amino acid metabolism	1	7	8	40	4.37947e-05	0.0122625	ENSG00000069535(MAOB)	ENSG00000274276(CBSL),ENSG00000146733(PSPH),ENSG00000182199(SHMT2),ENSG00000160200(CBS),ENSG00000135069(PSAT1),ENSG00000092621(PHGDH),ENSG00000116761(CTH)	ENSG00000069535(MAOB)ENSG00000160211(G6PD),ENSG00000168765(GSTM4),ENSG00000143198(MGST3),ENSG00000166825(ANPEP)ENSG00000115221(ITGB6),ENSG00000164171(ITGA2),ENSG00000184009(ACTG1),ENSG00000157388(CACNA1D),ENSG00000134755(DSC2),ENSG00000075624(ACTB),ENSG00000173402(DAG1)ENSG00000184009(ACTG1),ENSG00000014216(CAPN1),ENSG00000127824(TUBA4A),ENSG00000117984(CTSD),ENSG00000163131(CTSS),ENSG00000138794…	ENSG00000274276(CBSL),ENSG00000146733(PSPH),ENSG00000182199(SHMT2),ENSG00000160200(CBS),ENSG00000135069(PSAT1),ENSG00000092621(PHGDH),ENSG00000116761(CTH)ENSG00000131067(GGT7),ENSG00000065621(GSTO2),ENSG00000117862(TXNDC12),ENSG00000128965(CHAC1)ENSG00000138795(LEF1),ENSG00000153956(CACNA2D1)ENSG00000135116(HRK),ENSG00000175197(DDIT3),ENSG00000099860(GADD45B),ENSG00000132906(CASP9),ENSG0000011671…	http://www.kegg.jp/kegg-bin/show_pathway?map00260/K01697%09%23FFFFFF,green/K01758%09%23FFFFFF,green/K00831%09%23FFFFFF,green/K01079%09%23FFFFFF,green/K00058%09%23FFFFFF,green/K00274%09%23FFFFFF,red/K00600%09%23FFFFFF,green/
hsa00480	Glutathione metabolism	Metabolism	Metabolism of other amino acids	4	4	8	54	0.000393573	0.0427709	ENSG00000160211(G6PD),ENSG00000168765(GSTM4),ENSG00000143198(MGST3),ENSG00000166825(ANPEP)	ENSG00000131067(GGT7),ENSG00000065621(GSTO2),ENSG00000117862(TXNDC12),ENSG00000128965(CHAC1)			http://www.kegg.jp/kegg-bin/show_pathway?map00480/K07232%09%23FFFFFF,green/K00036%09%23FFFFFF,red/K00681%09%23FFFFFF,green/K00799%09%23FFFFFF,purple/K11140%09%23FFFFFF,red/K05360%09%23FFFFFF,green/
hsa05412	Arrhythmogenic right ventricular cardiomyopathy (ARVC)	Human Diseases	Cardiovascular diseases	7	2	9	69	0.00045826	0.0427709	ENSG00000115221(ITGB6),ENSG00000164171(ITGA2),ENSG00000184009(ACTG1),ENSG00000157388(CACNA1D),ENSG00000134755(DSC2),ENSG00000075624(ACTB),ENSG00000173402(DAG1)	ENSG00000138795(LEF1),ENSG00000153956(CACNA2D1)			http://www.kegg.jp/kegg-bin/show_pathway?map05412/K06589%09%23FFFFFF,red/K04492%09%23FFFFFF,green/K04858%09%23FFFFFF,green/K06265%09%23FFFFFF,red/K07601%09%23FFFFFF,red/K04851%09%23FFFFFF,red/K05692%09%23FFFFFF,red/K06481%09%23FFFFFF,red/
hsa04210	Apoptosis	Cellular Processes	Cell growth and death	8	5	13	136	0.000628568	0.0439998	ENSG00000184009(ACTG1),ENSG00000014216(CAPN1),ENSG00000127824(TUBA4A),ENSG00000117984(CTSD),ENSG00000163131(CTSS),ENSG00000138794(CASP6),ENSG00000075624(ACTB),ENSG00000167553(TUBA1C)	ENSG00000135116(HRK),ENSG00000175197(DDIT3),ENSG00000099860(GADD45B),ENSG00000132906(CASP9),ENSG00000116717(GADD45A)			http://www.kegg.jp/kegg-bin/show_pathway?map04210/K04452%09%23FFFFFF,green/K01379%09%23FFFFFF,red/K01367%09%23FFFFFF,red/K02512%09%23FFFFFF,green/K04402%09%23FFFFFF,green/K07374%09%23FFFFFF,red/K01368%09%23FFFFFF,red/K04396%09%23FFFFFF,red/K05692%09%23FFFFFF,red/K04399%09%23FFFFFF,green/
hsa05130	Pathogenic Escherichia coli infection	Human Diseases	Infectious diseases: Bacterial	6	1	7	51	0.00143997	0.0699137	ENSG00000184009(ACTG1),ENSG00000127824(TUBA4A),ENSG00000196230(TUBB),ENSG00000075624(ACTB),ENSG00000154229(PRKCA),ENSG00000167553(TUBA1C)	ENSG00000010810(FYN)			http://www.kegg.jp/kegg-bin/show_pathway?map05130/K05703%09%23FFFFFF,green/K07375%09%23FFFFFF,red/K05692%09%23FFFFFF,red/K07374%09%23FFFFFF,red/K02677%09%23FFFFFF,red/
hsa00790	Folate biosynthesis	Metabolism	Metabolism of cofactors and vitamins	2	3	5	26	0.00149815	0.0699137	ENSG00000085662(AKR1B1),ENSG00000196139(AKR1C3)	ENSG00000075643(MOCOS),ENSG00000163286(ALPG),ENSG00000162551(ALPL)			http://www.kegg.jp/kegg-bin/show_pathway?map00790/K15631%09%23FFFFFF,green/K01077%09%23FFFFFF,green/K00011%09%23FFFFFF,red/K04119%09%23FFFFFF,red/
hsa05134	Legionellosis	Human Diseases	Infectious diseases: Bacterial	4	3	7	54	0.00202161	0.0764337	ENSG00000109971(HSPA8),ENSG00000204388(HSPA1B),ENSG00000163739(CXCL1),ENSG00000165280(VCP)	ENSG00000136244(IL6),ENSG00000132906(CASP9),ENSG00000081041(CXCL2)			http://www.kegg.jp/kegg-bin/show_pathway?map05134/K03283%09%23FFFFFF,red/K05505%09%23FFFFFF,purple/K05405%09%23FFFFFF,green/K13525%09%23FFFFFF,red/K04399%09%23FFFFFF,green/
hsa05416	Viral myocarditis	Human Diseases	Cardiovascular diseases	4	3	7	55	0.00225119	0.0764337	ENSG00000184009(ACTG1),ENSG00000105974(CAV1),ENSG00000075624(ACTB),ENSG00000173402(DAG1)	ENSG00000010810(FYN),ENSG00000132906(CASP9),ENSG00000143322(ABL2)			http://www.kegg.jp/kegg-bin/show_pathway?map05416/K05703%09%23FFFFFF,green/K05692%09%23FFFFFF,red/K08887%09%23FFFFFF,green/K06278%09%23FFFFFF,red/K06265%09%23FFFFFF,red/K04399%09%23FFFFFF,green/
hsa04115	p53 signaling pathway	Cellular Processes	Cell growth and death	3	5	8	71	0.0024568	0.0764337	ENSG00000085117(CD82),ENSG00000115107(STEAP3),ENSG00000206075(SERPINB5)	ENSG00000099860(GADD45B),ENSG00000146674(IGFBP3),ENSG00000116717(GADD45A),ENSG00000132906(CASP9),ENSG00000130766(SESN2)			http://www.kegg.jp/kegg-bin/show_pathway?map04115/K20394%09%23FFFFFF,green/K10138%09%23FFFFFF,green/K10142%09%23FFFFFF,red/K10139%09%23FFFFFF,red/K04402%09%23FFFFFF,green/K06509%09%23FFFFFF,red/K04399%09%23FFFFFF,green/
hsa05202	Transcriptional misregulation in cancer	Human Diseases	Cancers: Overview	2	12	14	179	0.00275571	0.07716	ENSG00000185630(PBX1),ENSG00000149948(HMGA2)	ENSG00000132326(PER2),ENSG00000175197(DDIT3),ENSG00000175832(ETV4),ENSG00000176046(NUPR1),ENSG00000136244(IL6),ENSG00000099860(GADD45B),ENSG00000146674(IGFBP3),ENSG00000119508(NR4A3),ENSG00000245848(CEBPA),ENSG00000116717(GADD45A),ENSG00000006468(ETV1),ENSG00000244405(ETV5)			http://www.kegg.jp/kegg-bin/show_pathway?map05202/K04452%09%23FFFFFF,green/K10138%09%23FFFFFF,green/K09283%09%23FFFFFF,red/K09055%09%23FFFFFF,green/K09355%09%23FFFFFF,red/K04402%09%23FFFFFF,green/K15593%09%23FFFFFF,green/K09431%09%23FFFFFF,green/K05405%09%23FFFFFF,green/K08559%09%23FFFFFF,green/K02633%09%23FFFFFF,green/K15626%09%23FFFFFF,green/K15592%09%23FFFFFF,green/
hsa00970	Aminoacyl-tRNA biosynthesis	Genetic Information Processing	Translation	0	6	6	44	0.00323656	0.0823852	-	ENSG00000090861(AARS),ENSG00000110619(CARS),ENSG00000031698(SARS),ENSG00000134684(YARS),ENSG00000166986(MARS),ENSG00000140105(WARS)			http://www.kegg.jp/kegg-bin/show_pathway?map00970/K01872%09%23FFFFFF,green/K01866%09%23FFFFFF,green/K01875%09%23FFFFFF,green/K01883%09%23FFFFFF,green/K01874%09%23FFFFFF,green/K01867%09%23FFFFFF,green/
hsa04657	IL-17 signaling pathway	Organismal Systems	Immune system	4	5	9	93	0.00385148	0.0898679	ENSG00000137745(MMP13),ENSG00000080824(HSP90AA1),ENSG00000163739(CXCL1),ENSG00000215182(MUC5AC)	ENSG00000141639(MAPK4),ENSG00000117983(MUC5B),ENSG00000136244(IL6),ENSG00000081041(CXCL2),ENSG00000118503(TNFAIP3)			http://www.kegg.jp/kegg-bin/show_pathway?map04657/K05505%09%23FFFFFF,purple/K13908%09%23FFFFFF,green/K21125%09%23FFFFFF,red/K04079%09%23FFFFFF,red/K05405%09%23FFFFFF,green/K11859%09%23FFFFFF,green/K06855%09%23FFFFFF,green/K07994%09%23FFFFFF,red/
hsa05410	Hypertrophic cardiomyopathy (HCM)	Human Diseases	Cardiovascular diseases	6	2	8	80	0.00516275	0.111198	ENSG00000115221(ITGB6),ENSG00000075624(ACTB),ENSG00000173402(DAG1),ENSG00000164171(ITGA2),ENSG00000184009(ACTG1),ENSG00000157388(CACNA1D)	ENSG00000136244(IL6),ENSG00000153956(CACNA2D1)			http://www.kegg.jp/kegg-bin/show_pathway?map05410/K04851%09%23FFFFFF,red/K05405%09%23FFFFFF,green/K06589%09%23FFFFFF,red/K04858%09%23FFFFFF,green/K05692%09%23FFFFFF,red/K06481%09%23FFFFFF,red/K06265%09%23FFFFFF,red/
hsa04512	ECM-receptor interaction	Environmental Information Processing	Signaling molecules and interaction	7	1	8	82	0.00599277	0.115049	ENSG00000115221(ITGB6),ENSG00000115414(FN1),ENSG00000164171(ITGA2),ENSG00000173402(DAG1),ENSG00000112769(LAMA4),ENSG00000026508(CD44),ENSG00000197565(COL4A6)	ENSG00000092758(COL9A3)			http://www.kegg.jp/kegg-bin/show_pathway?map04512/K06256%09%23FFFFFF,red/K05717%09%23FFFFFF,red/K06237%09%23FFFFFF,red/K06589%09%23FFFFFF,red/K06265%09%23FFFFFF,red/K06241%09%23FFFFFF,red/K08131%09%23FFFFFF,green/K06481%09%23FFFFFF,red/
hsa05418	Fluid shear stress and atherosclerosis	Human Diseases	Cardiovascular diseases	7	4	11	137	0.00622406	0.115049	ENSG00000184009(ACTG1),ENSG00000105974(CAV1),ENSG00000168765(GSTM4),ENSG00000100292(HMOX1),ENSG00000143198(MGST3),ENSG00000075624(ACTB),ENSG00000080824(HSP90AA1)	ENSG00000120129(DUSP1),ENSG00000065621(GSTO2),ENSG00000169885(CALML6),ENSG00000112715(VEGFA)			http://www.kegg.jp/kegg-bin/show_pathway?map05418/K05448%09%23FFFFFF,green/K21278%09%23FFFFFF,green/K04079%09%23FFFFFF,red/K00799%09%23FFFFFF,purple/K05692%09%23FFFFFF,red/K02183%09%23FFFFFF,green/K06278%09%23FFFFFF,red/K00510%09%23FFFFFF,red/
hsa00340	Histidine metabolism	Metabolism	Amino acid metabolism	3	1	4	23	0.00657421	0.115049	ENSG00000108602(ALDH3A1),ENSG00000069535(MAOB),ENSG00000137124(ALDH1B1)	ENSG00000139344(AMDHD1)			http://www.kegg.jp/kegg-bin/show_pathway?map00340/K00129%09%23FFFFFF,red/K00128%09%23FFFFFF,red/K01468%09%23FFFFFF,green/K00274%09%23FFFFFF,red/
hsa04974	Protein digestion and absorption	Organismal Systems	Digestive system	4	4	8	88	0.00909671	0.148686	ENSG00000106688(SLC1A1),ENSG00000182871(COL18A1),ENSG00000111799(COL12A1),ENSG00000197565(COL4A6)	ENSG00000105281(SLC1A5),ENSG00000069849(ATP1B3),ENSG00000134294(SLC38A2),ENSG00000092758(COL9A3)			http://www.kegg.jp/kegg-bin/show_pathway?map04974/K06823%09%23FFFFFF,red/K06237%09%23FFFFFF,red/K05616%09%23FFFFFF,green/K14207%09%23FFFFFF,green/K08132%09%23FFFFFF,red/K05612%09%23FFFFFF,red/K08131%09%23FFFFFF,green/K01540%09%23FFFFFF,green/
hsa04931	Insulin resistance	Human Diseases	Endocrine and metabolic diseases	0	9	9	107	0.0095584	0.148686	-	ENSG00000101255(TRIB3),ENSG00000109819(PPARGC1A),ENSG00000136244(IL6),ENSG00000009950(MLXIPL),ENSG00000146592(CREB5),ENSG00000198380(GFPT1),ENSG00000185950(IRS2),ENSG00000147162(OGT),ENSG00000100889(PCK2)			http://www.kegg.jp/kegg-bin/show_pathway?map04931/K19518%09%23FFFFFF,green/K01596%09%23FFFFFF,green/K07187%09%23FFFFFF,green/K09667%09%23FFFFFF,green/K00820%09%23FFFFFF,green/K07202%09%23FFFFFF,green/K05405%09%23FFFFFF,green/K09047%09%23FFFFFF,green/K09113%09%23FFFFFF,green/
hsa04810	Regulation of actin cytoskeleton	Cellular Processes	Cell motility	12	2	14	210	0.0110177	0.162365	ENSG00000115221(ITGB6),ENSG00000147065(MSN),ENSG00000115414(FN1),ENSG00000101335(MYL9),ENSG00000164171(ITGA2),ENSG00000184009(ACTG1),ENSG00000055163(CYFIP2),ENSG00000181104(F2R),ENSG00000006747(SCIN),ENSG00000160867(FGFR4),ENSG00000148180(GSN),ENSG00000075624(ACTB)	ENSG00000133019(CHRM3),ENSG00000156886(ITGAD)			http://www.kegg.jp/kegg-bin/show_pathway?map04810/K05717%09%23FFFFFF,red/K06589%09%23FFFFFF,red/K05095%09%23FFFFFF,red/K12755%09%23FFFFFF,red/K06594%09%23FFFFFF,green/K04131%09%23FFFFFF,green/K05749%09%23FFFFFF,red/K03914%09%23FFFFFF,red/K06481%09%23FFFFFF,red/K05692%09%23FFFFFF,red/K05768%09%23FFFFFF,red/K05763%09%23FFFFFF,red/
hsa04530	Tight junction	Cellular Processes	Cellular community - eukaryotes	7	5	12	170	0.0117852	0.164992	ENSG00000147065(MSN),ENSG00000101335(MYL9),ENSG00000184009(ACTG1),ENSG00000127824(TUBA4A),ENSG00000157388(CACNA1D),ENSG00000075624(ACTB),ENSG00000167553(TUBA1C)	ENSG00000163347(CLDN1),ENSG00000069869(NEDD4),ENSG00000181885(CLDN7),ENSG00000166025(AMOTL1),ENSG00000114019(AMOTL2)			http://www.kegg.jp/kegg-bin/show_pathway?map04530/K10591%09%23FFFFFF,green/K12755%09%23FFFFFF,red/K07374%09%23FFFFFF,red/K06104%09%23FFFFFF,green/K04851%09%23FFFFFF,red/K06087%09%23FFFFFF,green/K05692%09%23FFFFFF,red/K05763%09%23FFFFFF,red/
hsa04510	Focal adhesion	Cellular Processes	Cellular community - eukaryotes	10	3	13	198	0.0157186	0.206358	ENSG00000115221(ITGB6),ENSG00000075624(ACTB),ENSG00000154229(PRKCA),ENSG00000112769(LAMA4),ENSG00000197565(COL4A6),ENSG00000115414(FN1),ENSG00000101335(MYL9),ENSG00000164171(ITGA2),ENSG00000184009(ACTG1),ENSG00000105974(CAV1)	ENSG00000010810(FYN),ENSG00000112715(VEGFA),ENSG00000092758(COL9A3)			http://www.kegg.jp/kegg-bin/show_pathway?map04510/K06237%09%23FFFFFF,red/K05717%09%23FFFFFF,red/K05703%09%23FFFFFF,green/K06589%09%23FFFFFF,red/K05448%09%23FFFFFF,green/K12755%09%23FFFFFF,red/K06241%09%23FFFFFF,red/K08131%09%23FFFFFF,green/K06481%09%23FFFFFF,red/K05692%09%23FFFFFF,red/K06278%09%23FFFFFF,red/K02677%09%23FFFFFF,red/
hsa00512	Mucin type O-glycan biosynthesis	Metabolism	Glycan biosynthesis and metabolism	4	0	4	30	0.0169404	0.206358	ENSG00000139629(GALNT6),ENSG00000109586(GALNT7),ENSG00000140297(GCNT3),ENSG00000171155(C1GALT1C1)	-			http://www.kegg.jp/kegg-bin/show_pathway?map00512/K09662%09%23FFFFFF,red/K00710%09%23FFFFFF,red/K09653%09%23FFFFFF,red/
hsa00360	Phenylalanine metabolism	Metabolism	Amino acid metabolism	2	1	3	17	0.0177759	0.206358	ENSG00000108602(ALDH3A1),ENSG00000069535(MAOB)	ENSG00000120053(GOT1)			http://www.kegg.jp/kegg-bin/show_pathway?map00360/K00129%09%23FFFFFF,red/K14454%09%23FFFFFF,green/K00274%09%23FFFFFF,red/
hsa00020	Citrate cycle (TCA cycle)	Metabolism	Carbohydrate metabolism	3	1	4	31	0.0189502	0.206358	ENSG00000105953(OGDH),ENSG00000122729(ACO1),ENSG00000131473(ACLY)	ENSG00000100889(PCK2)			http://www.kegg.jp/kegg-bin/show_pathway?map00020/K01648%09%23FFFFFF,red/K01681%09%23FFFFFF,red/K00164%09%23FFFFFF,red/K01596%09%23FFFFFF,green/
hsa04666	Fc gamma R-mediated phagocytosis	Organismal Systems	Immune system	7	0	7	82	0.0196269	0.206358	ENSG00000129219(PLD2),ENSG00000277443(MARCKS),ENSG00000006747(SCIN),ENSG00000145555(MYO10),ENSG00000148180(GSN),ENSG00000154229(PRKCA),ENSG00000175130(MARCKSL1)	-			http://www.kegg.jp/kegg-bin/show_pathway?map04666/K12559%09%23FFFFFF,red/K12561%09%23FFFFFF,red/K13536%09%23FFFFFF,red/K01115%09%23FFFFFF,red/K05768%09%23FFFFFF,red/K02677%09%23FFFFFF,red/
hsa00270	Cysteine and methionine metabolism	Metabolism	Amino acid metabolism	1	4	5	47	0.0197302	0.206358	ENSG00000134333(LDHA)	ENSG00000274276(CBSL),ENSG00000120053(GOT1),ENSG00000160200(CBS),ENSG00000116761(CTH)			http://www.kegg.jp/kegg-bin/show_pathway?map00270/K01697%09%23FFFFFF,green/K01758%09%23FFFFFF,green/K00016%09%23FFFFFF,red/K14454%09%23FFFFFF,green/
hsa05206	MicroRNAs in cancer	Human Diseases	Cancers: Overview	8	2	10	141	0.0198988	0.206358	ENSG00000277443(MARCKS),ENSG00000100234(TIMP3),ENSG00000149948(HMGA2),ENSG00000100292(HMOX1),ENSG00000074181(NOTCH3),ENSG00000206075(SERPINB5),ENSG00000154229(PRKCA),ENSG00000026508(CD44)	ENSG00000112715(VEGFA),ENSG00000185950(IRS2)			http://www.kegg.jp/kegg-bin/show_pathway?map05206/K12561%09%23FFFFFF,red/K06256%09%23FFFFFF,red/K05448%09%23FFFFFF,green/K09283%09%23FFFFFF,red/K16866%09%23FFFFFF,red/K20995%09%23FFFFFF,red/K10139%09%23FFFFFF,red/K07187%09%23FFFFFF,green/K02677%09%23FFFFFF,red/K00510%09%23FFFFFF,red/
hsa05414	Dilated cardiomyopathy (DCM)	Human Diseases	Cardiovascular diseases	6	1	7	84	0.0221066	0.221066	ENSG00000115221(ITGB6),ENSG00000075624(ACTB),ENSG00000173402(DAG1),ENSG00000164171(ITGA2),ENSG00000184009(ACTG1),ENSG00000157388(CACNA1D)	ENSG00000153956(CACNA2D1)			http://www.kegg.jp/kegg-bin/show_pathway?map05414/K04851%09%23FFFFFF,red/K06589%09%23FFFFFF,red/K04858%09%23FFFFFF,green/K05692%09%23FFFFFF,red/K06481%09%23FFFFFF,red/K06265%09%23FFFFFF,red/
hsa05143	African trypanosomiasis	Human Diseases	Infectious diseases: Parasitic	3	1	4	33	0.0233965	0.225078	ENSG00000112769(LAMA4),ENSG00000154229(PRKCA),ENSG00000164251(F2RL1)	ENSG00000136244(IL6)			http://www.kegg.jp/kegg-bin/show_pathway?map05143/K06241%09%23FFFFFF,red/K05405%09%23FFFFFF,green/K04234%09%23FFFFFF,red/K02677%09%23FFFFFF,red/
hsa00100	Steroid biosynthesis	Metabolism	Lipid metabolism	3	0	3	19	0.0241155	0.225078	ENSG00000147383(NSDHL),ENSG00000116133(DHCR24),ENSG00000052802(MSMO1)	-			http://www.kegg.jp/kegg-bin/show_pathway?map00100/K07750%09%23FFFFFF,red/K07748%09%23FFFFFF,red/K09828%09%23FFFFFF,red/
hsa04970	Salivary secretion	Organismal Systems	Digestive system	2	5	7	87	0.0262202	0.227403	ENSG00000058668(ATP2B4),ENSG00000154229(PRKCA)	ENSG00000117983(MUC5B),ENSG00000069849(ATP1B3),ENSG00000169885(CALML6),ENSG00000133019(CHRM3),ENSG00000187908(DMBT1)			http://www.kegg.jp/kegg-bin/show_pathway?map04970/K04131%09%23FFFFFF,green/K05850%09%23FFFFFF,red/K02183%09%23FFFFFF,green/K13912%09%23FFFFFF,green/K13908%09%23FFFFFF,green/K01540%09%23FFFFFF,green/K02677%09%23FFFFFF,red/
hsa04145	Phagosome	Cellular Processes	Transport and catabolism	9	1	10	148	0.0267889	0.227403	ENSG00000164171(ITGA2),ENSG00000184009(ACTG1),ENSG00000127824(TUBA4A),ENSG00000159403(C1R),ENSG00000153246(PLA2R1),ENSG00000196230(TUBB),ENSG00000075624(ACTB),ENSG00000163131(CTSS),ENSG00000167553(TUBA1C)	ENSG00000078142(PIK3C3)			http://www.kegg.jp/kegg-bin/show_pathway?map04145/K01330%09%23FFFFFF,red/K06560%09%23FFFFFF,red/K07375%09%23FFFFFF,red/K00914%09%23FFFFFF,green/K07374%09%23FFFFFF,red/K01368%09%23FFFFFF,red/K05692%09%23FFFFFF,red/K06481%09%23FFFFFF,red/
hsa00010	Glycolysis / Gluconeogenesis	Metabolism	Carbohydrate metabolism	5	1	6	69	0.0274628	0.227403	ENSG00000134333(LDHA),ENSG00000067225(PKM),ENSG00000108602(ALDH3A1),ENSG00000105220(GPI),ENSG00000137124(ALDH1B1)	ENSG00000100889(PCK2)			http://www.kegg.jp/kegg-bin/show_pathway?map00010/K01810%09%23FFFFFF,red/K00016%09%23FFFFFF,red/K00129%09%23FFFFFF,red/K00128%09%23FFFFFF,red/K01596%09%23FFFFFF,green/K00873%09%23FFFFFF,red/
hsa00670	One carbon pool by folate	Metabolism	Metabolism of cofactors and vitamins	0	3	3	20	0.0276842	0.227403	-	ENSG00000065911(MTHFD2),ENSG00000182199(SHMT2),ENSG00000136010(ALDH1L2)			http://www.kegg.jp/kegg-bin/show_pathway?map00670/K13403%09%23FFFFFF,green/K00289%09%23FFFFFF,green/K00600%09%23FFFFFF,green/
hsa00250	Alanine, aspartate and glutamate metabolism	Metabolism	Amino acid metabolism	0	4	4	35	0.0284254	0.227403	-	ENSG00000120053(GOT1),ENSG00000166123(GPT2),ENSG00000070669(ASNS),ENSG00000198380(GFPT1)			http://www.kegg.jp/kegg-bin/show_pathway?map00250/K00820%09%23FFFFFF,green/K14454%09%23FFFFFF,green/K01953%09%23FFFFFF,green/K00814%09%23FFFFFF,green/
hsa04024	cAMP signaling pathway	Environmental Information Processing	Signal transduction	6	6	12	195	0.0308512	0.239954	ENSG00000129219(PLD2),ENSG00000101335(MYL9),ENSG00000058668(ATP2B4),ENSG00000181104(F2R),ENSG00000157388(CACNA1D),ENSG00000144191(CNGA3)	ENSG00000069849(ATP1B3),ENSG00000152270(PDE3B),ENSG00000158748(HTR6),ENSG00000169885(CALML6),ENSG00000146592(CREB5),ENSG00000079435(LIPE)			http://www.kegg.jp/kegg-bin/show_pathway?map04024/K04162%09%23FFFFFF,green/K12755%09%23FFFFFF,red/K13296%09%23FFFFFF,green/K04851%09%23FFFFFF,red/K03914%09%23FFFFFF,red/K05850%09%23FFFFFF,red/K02183%09%23FFFFFF,green/K01115%09%23FFFFFF,red/K01540%09%23FFFFFF,green/K09047%09%23FFFFFF,green/K07188%09%23FFFFFF,green/K04950%09%23FFFFFF,red/
hsa01524	Platinum drug resistance	Human Diseases	Drug resistance: Antineoplastic	3	3	6	72	0.0329639	0.248397	ENSG00000168765(GSTM4),ENSG00000143198(MGST3),ENSG00000023839(ABCC2)	ENSG00000136868(SLC31A1),ENSG00000065621(GSTO2),ENSG00000132906(CASP9)			http://www.kegg.jp/kegg-bin/show_pathway?map01524/K00799%09%23FFFFFF,purple/K05666%09%23FFFFFF,red/K14686%09%23FFFFFF,green/K04399%09%23FFFFFF,green/
hsa04923	Regulation of lipolysis in adipocytes	Organismal Systems	Endocrine system	1	4	5	54	0.033711	0.248397	ENSG00000095303(PTGS1)	ENSG00000152270(PDE3B),ENSG00000185950(IRS2),ENSG00000135346(CGA),ENSG00000079435(LIPE)			http://www.kegg.jp/kegg-bin/show_pathway?map04923/K07187%09%23FFFFFF,green/K00509%09%23FFFFFF,red/K08522%09%23FFFFFF,green/K07188%09%23FFFFFF,green/K13296%09%23FFFFFF,green/
hsa00980	Metabolism of xenobiotics by cytochrome P450	Metabolism	Xenobiotics biodegradation and metabolism	5	1	6	73	0.0349452	0.250889	ENSG00000187134(AKR1C1),ENSG00000143819(EPHX1),ENSG00000108602(ALDH3A1),ENSG00000168765(GSTM4),ENSG00000143198(MGST3)	ENSG00000065621(GSTO2)			http://www.kegg.jp/kegg-bin/show_pathway?map00980/K00129%09%23FFFFFF,red/K00799%09%23FFFFFF,purple/K01253%09%23FFFFFF,red/K00212%09%23FFFFFF,red/
hsa05222	Small cell lung cancer	Human Diseases	Cancers: Specific types	4	3	7	93	0.0359497	0.251648	ENSG00000115414(FN1),ENSG00000164171(ITGA2),ENSG00000112769(LAMA4),ENSG00000197565(COL4A6)	ENSG00000099860(GADD45B),ENSG00000132906(CASP9),ENSG00000116717(GADD45A)			http://www.kegg.jp/kegg-bin/show_pathway?map05222/K06241%09%23FFFFFF,red/K05717%09%23FFFFFF,red/K06237%09%23FFFFFF,red/K06481%09%23FFFFFF,red/K04402%09%23FFFFFF,green/K04399%09%23FFFFFF,green/
hsa05100	Bacterial invasion of epithelial cells	Human Diseases	Infectious diseases: Bacterial	6	0	6	74	0.0370017	0.251831	ENSG00000197959(DNM3),ENSG00000115414(FN1),ENSG00000184009(ACTG1),ENSG00000105974(CAV1),ENSG00000102890(ELMO3),ENSG00000075624(ACTB)	-			http://www.kegg.jp/kegg-bin/show_pathway?map05100/K01528%09%23FFFFFF,red/K05717%09%23FFFFFF,red/K05692%09%23FFFFFF,red/K06278%09%23FFFFFF,red/K19241%09%23FFFFFF,red/
hsa04640	Hematopoietic cell lineage	Organismal Systems	Immune system	5	2	7	94	0.0377747	0.251831	ENSG00000168685(IL7R),ENSG00000164171(ITGA2),ENSG00000272398(CD24),ENSG00000166825(ANPEP),ENSG00000026508(CD44)	ENSG00000136244(IL6),ENSG00000198223(CSF2RA)			http://www.kegg.jp/kegg-bin/show_pathway?map04640/K06256%09%23FFFFFF,red/K05405%09%23FFFFFF,green/K05072%09%23FFFFFF,red/K06481%09%23FFFFFF,red/K11140%09%23FFFFFF,red/K05066%09%23FFFFFF,green/K06469%09%23FFFFFF,red/
hsa04218	Cellular senescence	Cellular Processes	Cell growth and death	3	7	10	158	0.0393704	0.252379	ENSG00000014216(CAPN1),ENSG00000157388(CACNA1D),ENSG00000213585(VDAC1)	ENSG00000187840(EIF4EBP1),ENSG00000136244(IL6),ENSG00000099860(GADD45B),ENSG00000146674(IGFBP3),ENSG00000169885(CALML6),ENSG00000116717(GADD45A),ENSG00000101096(NFATC2)			http://www.kegg.jp/kegg-bin/show_pathway?map04218/K10138%09%23FFFFFF,green/K01367%09%23FFFFFF,red/K04402%09%23FFFFFF,green/K05862%09%23FFFFFF,red/K04851%09%23FFFFFF,red/K07205%09%23FFFFFF,green/K17332%09%23FFFFFF,green/K05405%09%23FFFFFF,green/K02183%09%23FFFFFF,green/
hsa04925	Aldosterone synthesis and secretion	Organismal Systems	Endocrine system	3	4	7	95	0.0396596	0.252379	ENSG00000058668(ATP2B4),ENSG00000157388(CACNA1D),ENSG00000154229(PRKCA)	ENSG00000069849(ATP1B3),ENSG00000169885(CALML6),ENSG00000146592(CREB5),ENSG00000079435(LIPE)			http://www.kegg.jp/kegg-bin/show_pathway?map04925/K04851%09%23FFFFFF,red/K05850%09%23FFFFFF,red/K02183%09%23FFFFFF,green/K01540%09%23FFFFFF,green/K09047%09%23FFFFFF,green/K07188%09%23FFFFFF,green/K02677%09%23FFFFFF,red/
hsa00620	Pyruvate metabolism	Metabolism	Carbohydrate metabolism	3	1	4	40	0.0436112	0.26546	ENSG00000134333(LDHA),ENSG00000067225(PKM),ENSG00000137124(ALDH1B1)	ENSG00000100889(PCK2)			http://www.kegg.jp/kegg-bin/show_pathway?map00620/K00016%09%23FFFFFF,red/K00128%09%23FFFFFF,red/K01596%09%23FFFFFF,green/K00873%09%23FFFFFF,red/
hsa00380	Tryptophan metabolism	Metabolism	Amino acid metabolism	4	0	4	40	0.0436112	0.26546	ENSG00000105953(OGDH),ENSG00000121691(CAT),ENSG00000069535(MAOB),ENSG00000137124(ALDH1B1)	-			http://www.kegg.jp/kegg-bin/show_pathway?map00380/K00128%09%23FFFFFF,red/K00164%09%23FFFFFF,red/K03781%09%23FFFFFF,red/K00274%09%23FFFFFF,red/
hsa04022	cGMP-PKG signaling pathway	Environmental Information Processing	Signal transduction	4	6	10	162	0.0453846	0.268446	ENSG00000101335(MYL9),ENSG00000058668(ATP2B4),ENSG00000157388(CACNA1D),ENSG00000213585(VDAC1)	ENSG00000069849(ATP1B3),ENSG00000152270(PDE3B),ENSG00000169885(CALML6),ENSG00000146592(CREB5),ENSG00000185950(IRS2),ENSG00000101096(NFATC2)			http://www.kegg.jp/kegg-bin/show_pathway?map04022/K12755%09%23FFFFFF,red/K13296%09%23FFFFFF,green/K05862%09%23FFFFFF,red/K04851%09%23FFFFFF,red/K07187%09%23FFFFFF,green/K05850%09%23FFFFFF,red/K17332%09%23FFFFFF,green/K02183%09%23FFFFFF,green/K01540%09%23FFFFFF,green/K09047%09%23FFFFFF,green/
hsa04370	VEGF signaling pathway	Environmental Information Processing	Signal transduction	2	3	5	59	0.0467043	0.268446	ENSG00000106211(HSPB1),ENSG00000154229(PRKCA)	ENSG00000132906(CASP9),ENSG00000112715(VEGFA),ENSG00000101096(NFATC2)			http://www.kegg.jp/kegg-bin/show_pathway?map04370/K17332%09%23FFFFFF,green/K04455%09%23FFFFFF,red/K05448%09%23FFFFFF,green/K02677%09%23FFFFFF,red/K04399%09%23FFFFFF,green/
hsa04152	AMPK signaling pathway	Environmental Information Processing	Signal transduction	2	6	8	120	0.047889	0.268446	ENSG00000114268(PFKFB4),ENSG00000169710(FASN)	ENSG00000109819(PPARGC1A),ENSG00000187840(EIF4EBP1),ENSG00000146592(CREB5),ENSG00000079435(LIPE),ENSG00000185950(IRS2),ENSG00000100889(PCK2)			http://www.kegg.jp/kegg-bin/show_pathway?map04152/K00665%09%23FFFFFF,red/K01596%09%23FFFFFF,green/K07187%09%23FFFFFF,green/K07205%09%23FFFFFF,green/K07202%09%23FFFFFF,green/K19030%09%23FFFFFF,red/K07188%09%23FFFFFF,green/K09047%09%23FFFFFF,green/
hsa04610	Complement and coagulation cascades	Organismal Systems	Immune system	5	1	6	79	0.048435	0.268446	ENSG00000182326(C1S),ENSG00000181104(F2R),ENSG00000120885(CLU),ENSG00000159403(C1R),ENSG00000117525(F3)	ENSG00000000971(CFH)			http://www.kegg.jp/kegg-bin/show_pathway?map04610/K01330%09%23FFFFFF,red/K03914%09%23FFFFFF,red/K03901%09%23FFFFFF,red/K01331%09%23FFFFFF,red/K17252%09%23FFFFFF,red/K04004%09%23FFFFFF,green/
hsa04151	PI3K-Akt signaling pathway	Environmental Information Processing	Signal transduction	10	8	18	352	0.0488955	0.268446	ENSG00000168685(IL7R),ENSG00000115221(ITGB6),ENSG00000181104(F2R),ENSG00000154229(PRKCA),ENSG00000112769(LAMA4),ENSG00000080824(HSP90AA1),ENSG00000197565(COL4A6),ENSG00000115414(FN1),ENSG00000164171(ITGA2),ENSG00000160867(FGFR4)	ENSG00000187840(EIF4EBP1),ENSG00000136244(IL6),ENSG00000146592(CREB5),ENSG00000112715(VEGFA),ENSG00000100889(PCK2),ENSG00000123143(PKN1),ENSG00000132906(CASP9),ENSG00000092758(COL9A3)			http://www.kegg.jp/kegg-bin/show_pathway?map04151/K06589%09%23FFFFFF,red/K05095%09%23FFFFFF,red/K05448%09%23FFFFFF,green/K07205%09%23FFFFFF,green/K06241%09%23FFFFFF,red/K03914%09%23FFFFFF,red/K05072%09%23FFFFFF,red/K06481%09%23FFFFFF,red/K09047%09%23FFFFFF,green/K02677%09%23FFFFFF,red/K05717%09%23FFFFFF,red/K06237%09%23FFFFFF,red/K01596%09%23FFFFFF,green/K04079%09%23FFFFFF,red/K06071%09%23FFFFFF,…
hsa04141	Protein processing in endoplasmic reticulum	Genetic Information Processing	Folding, sorting and degradation	6	4	10	165	0.0502837	0.270758	ENSG00000109971(HSPA8),ENSG00000014216(CAPN1),ENSG00000204388(HSPA1B),ENSG00000120694(HSPH1),ENSG00000080824(HSP90AA1),ENSG00000165280(VCP)	ENSG00000114850(SSR3),ENSG00000175197(DDIT3),ENSG00000051108(HERPUD1),ENSG00000087074(PPP1R15A)			http://www.kegg.jp/kegg-bin/show_pathway?map04141/K13251%09%23FFFFFF,green/K04452%09%23FFFFFF,green/K01367%09%23FFFFFF,red/K13525%09%23FFFFFF,red/K14019%09%23FFFFFF,green/K04079%09%23FFFFFF,red/K03283%09%23FFFFFF,red/K14027%09%23FFFFFF,green/K09485%09%23FFFFFF,red/
hsa05225	Hepatocellular carcinoma	Human Diseases	Cancers: Specific types	6	4	10	166	0.0519923	0.27095	ENSG00000184009(ACTG1),ENSG00000168765(GSTM4),ENSG00000100292(HMOX1),ENSG00000143198(MGST3),ENSG00000075624(ACTB),ENSG00000154229(PRKCA)	ENSG00000099860(GADD45B),ENSG00000065621(GSTO2),ENSG00000138795(LEF1),ENSG00000116717(GADD45A)			http://www.kegg.jp/kegg-bin/show_pathway?map05225/K00799%09%23FFFFFF,purple/K04492%09%23FFFFFF,green/K05692%09%23FFFFFF,red/K04402%09%23FFFFFF,green/K00510%09%23FFFFFF,red/K02677%09%23FFFFFF,red/
hsa04922	Glucagon signaling pathway	Organismal Systems	Endocrine system	2	5	7	101	0.0522547	0.27095	ENSG00000067225(PKM),ENSG00000134333(LDHA)	ENSG00000109819(PPARGC1A),ENSG00000152270(PDE3B),ENSG00000169885(CALML6),ENSG00000146592(CREB5),ENSG00000100889(PCK2)			http://www.kegg.jp/kegg-bin/show_pathway?map04922/K07202%09%23FFFFFF,green/K00016%09%23FFFFFF,red/K02183%09%23FFFFFF,green/K01596%09%23FFFFFF,green/K09047%09%23FFFFFF,green/K13296%09%23FFFFFF,green/K00873%09%23FFFFFF,red/
hsa05132	Salmonella infection	Human Diseases	Infectious diseases: Bacterial	3	3	6	81	0.0535549	0.272643	ENSG00000184009(ACTG1),ENSG00000075624(ACTB),ENSG00000163739(CXCL1)	ENSG00000136244(IL6),ENSG00000123143(PKN1),ENSG00000081041(CXCL2)			http://www.kegg.jp/kegg-bin/show_pathway?map05132/K05505%09%23FFFFFF,purple/K05405%09%23FFFFFF,green/K05692%09%23FFFFFF,red/K06071%09%23FFFFFF,green/
hsa04213	Longevity regulating pathway - multiple species	Organismal Systems	Aging	4	1	5	62	0.0557457	0.278729	ENSG00000109971(HSPA8),ENSG00000121691(CAT),ENSG00000204388(HSPA1B),ENSG00000162129(CLPB)	ENSG00000185950(IRS2)			http://www.kegg.jp/kegg-bin/show_pathway?map04213/K07187%09%23FFFFFF,green/K03283%09%23FFFFFF,red/K03695%09%23FFFFFF,red/K03781%09%23FFFFFF,red/
hsa05205	Proteoglycans in cancer	Human Diseases	Cancers: Overview	10	1	11	194	0.0611697	0.300483	ENSG00000147065(MSN),ENSG00000115414(FN1),ENSG00000164171(ITGA2),ENSG00000184009(ACTG1),ENSG00000105974(CAV1),ENSG00000100234(TIMP3),ENSG00000029534(ANK1),ENSG00000075624(ACTB),ENSG00000154229(PRKCA),ENSG00000026508(CD44)	ENSG00000112715(VEGFA)			http://www.kegg.jp/kegg-bin/show_pathway?map05205/K10380%09%23FFFFFF,red/K06256%09%23FFFFFF,red/K05717%09%23FFFFFF,red/K05448%09%23FFFFFF,green/K16866%09%23FFFFFF,red/K05692%09%23FFFFFF,red/K06481%09%23FFFFFF,red/K06278%09%23FFFFFF,red/K05763%09%23FFFFFF,red/K02677%09%23FFFFFF,red/
hsa04978	Mineral absorption	Organismal Systems	Digestive system	1	3	4	46	0.0667867	0.320227	ENSG00000100292(HMOX1)	ENSG00000136868(SLC31A1),ENSG00000069849(ATP1B3),ENSG00000174502(SLC26A9)			http://www.kegg.jp/kegg-bin/show_pathway?map04978/K14686%09%23FFFFFF,green/K01540%09%23FFFFFF,green/K14706%09%23FFFFFF,green/K00510%09%23FFFFFF,red/
hsa04068	FoxO signaling pathway	Environmental Information Processing	Signal transduction	3	5	8	129	0.0674764	0.320227	ENSG00000168685(IL7R),ENSG00000166851(PLK1),ENSG00000121691(CAT)	ENSG00000136244(IL6),ENSG00000099860(GADD45B),ENSG00000185950(IRS2),ENSG00000116717(GADD45A),ENSG00000100889(PCK2)			http://www.kegg.jp/kegg-bin/show_pathway?map04068/K07187%09%23FFFFFF,green/K05405%09%23FFFFFF,green/K05072%09%23FFFFFF,red/K06631%09%23FFFFFF,red/K01596%09%23FFFFFF,green/K03781%09%23FFFFFF,red/K04402%09%23FFFFFF,green/
hsa05200	Pathways in cancer	Human Diseases	Cancers: Overview	13	11	24	521	0.0698646	0.326035	ENSG00000168685(IL7R),ENSG00000074181(NOTCH3),ENSG00000181104(F2R),ENSG00000154229(PRKCA),ENSG00000112769(LAMA4),ENSG00000080824(HSP90AA1),ENSG00000197565(COL4A6),ENSG00000115414(FN1),ENSG00000164171(ITGA2),ENSG00000168765(GSTM4),ENSG00000100292(HMOX1),ENSG00000160867(FGFR4),ENSG00000143198(MGST3)	ENSG00000136244(IL6),ENSG00000099860(GADD45B),ENSG00000065621(GSTO2),ENSG00000112715(VEGFA),ENSG00000116717(GADD45A),ENSG00000125845(BMP2),ENSG00000132906(CASP9),ENSG00000138795(LEF1),ENSG00000169885(CALML6),ENSG00000245848(CEBPA),ENSG00000198223(CSF2RA)			http://www.kegg.jp/kegg-bin/show_pathway?map05200/K05095%09%23FFFFFF,red/K05448%09%23FFFFFF,green/K06241%09%23FFFFFF,red/K00799%09%23FFFFFF,purple/K03914%09%23FFFFFF,red/K02183%09%23FFFFFF,green/K05072%09%23FFFFFF,red/K06481%09%23FFFFFF,red/K02677%09%23FFFFFF,red/K05717%09%23FFFFFF,red/K06237%09%23FFFFFF,red/K04492%09%23FFFFFF,green/K20995%09%23FFFFFF,red/K09055%09%23FFFFFF,green/K04402%09%23FFFF…
hsa05031	Amphetamine addiction	Human Diseases	Substance dependence	3	2	5	67	0.0728981	0.334614	ENSG00000157388(CACNA1D),ENSG00000069535(MAOB),ENSG00000154229(PRKCA)	ENSG00000169885(CALML6),ENSG00000146592(CREB5)			http://www.kegg.jp/kegg-bin/show_pathway?map05031/K04851%09%23FFFFFF,red/K02183%09%23FFFFFF,green/K09047%09%23FFFFFF,green/K00274%09%23FFFFFF,red/K02677%09%23FFFFFF,red/
hsa04211	Longevity regulating pathway	Organismal Systems	Aging	1	5	6	89	0.0772062	0.337072	ENSG00000121691(CAT)	ENSG00000109819(PPARGC1A),ENSG00000187840(EIF4EBP1),ENSG00000146592(CREB5),ENSG00000185950(IRS2),ENSG00000130766(SESN2)			http://www.kegg.jp/kegg-bin/show_pathway?map04211/K07205%09%23FFFFFF,green/K07187%09%23FFFFFF,green/K20394%09%23FFFFFF,green/K07202%09%23FFFFFF,green/K03781%09%23FFFFFF,red/K09047%09%23FFFFFF,green/
hsa00630	Glyoxylate and dicarboxylate metabolism	Metabolism	Carbohydrate metabolism	2	1	3	30	0.0773605	0.337072	ENSG00000122729(ACO1),ENSG00000121691(CAT)	ENSG00000182199(SHMT2)			http://www.kegg.jp/kegg-bin/show_pathway?map00630/K01681%09%23FFFFFF,red/K03781%09%23FFFFFF,red/K00600%09%23FFFFFF,green/
hsa00982	Drug metabolism - cytochrome P450	Metabolism	Xenobiotics biodegradation and metabolism	4	1	5	69	0.0804799	0.337072	ENSG00000108602(ALDH3A1),ENSG00000168765(GSTM4),ENSG00000069535(MAOB),ENSG00000143198(MGST3)	ENSG00000065621(GSTO2)			http://www.kegg.jp/kegg-bin/show_pathway?map00982/K00129%09%23FFFFFF,red/K00799%09%23FFFFFF,purple/K00274%09%23FFFFFF,red/
hsa04670	Leukocyte transendothelial migration	Organismal Systems	Immune system	5	2	7	112	0.0812489	0.337072	ENSG00000147065(MSN),ENSG00000101335(MYL9),ENSG00000184009(ACTG1),ENSG00000075624(ACTB),ENSG00000154229(PRKCA)	ENSG00000163347(CLDN1),ENSG00000181885(CLDN7)			http://www.kegg.jp/kegg-bin/show_pathway?map04670/K06087%09%23FFFFFF,green/K05692%09%23FFFFFF,red/K12755%09%23FFFFFF,red/K05763%09%23FFFFFF,red/K02677%09%23FFFFFF,red/
hsa04710	Circadian rhythm	Organismal Systems	Environmental adaptation	0	3	3	31	0.0836187	0.337072	-	ENSG00000132326(PER2),ENSG00000143365(RORC),ENSG00000049246(PER3)			http://www.kegg.jp/kegg-bin/show_pathway?map04710/K21945%09%23FFFFFF,green/K02633%09%23FFFFFF,green/K08534%09%23FFFFFF,green/
hsa01523	Antifolate resistance	Human Diseases	Drug resistance: Antineoplastic	1	2	3	31	0.0836187	0.337072	ENSG00000023839(ABCC2)	ENSG00000182199(SHMT2),ENSG00000136244(IL6)			http://www.kegg.jp/kegg-bin/show_pathway?map01523/K05405%09%23FFFFFF,green/K05666%09%23FFFFFF,red/K00600%09%23FFFFFF,green/
hsa05146	Amoebiasis	Human Diseases	Infectious diseases: Parasitic	5	1	6	91	0.0839102	0.337072	ENSG00000115414(FN1),ENSG00000106211(HSPB1),ENSG00000112769(LAMA4),ENSG00000154229(PRKCA),ENSG00000197565(COL4A6)	ENSG00000136244(IL6)			http://www.kegg.jp/kegg-bin/show_pathway?map05146/K06241%09%23FFFFFF,red/K05717%09%23FFFFFF,red/K06237%09%23FFFFFF,red/K05405%09%23FFFFFF,green/K04455%09%23FFFFFF,red/K02677%09%23FFFFFF,red/
hsa04726	Serotonergic synapse	Organismal Systems	Nervous system	5	2	7	113	0.0842679	0.337072	ENSG00000157388(CACNA1D),ENSG00000069535(MAOB),ENSG00000012779(ALOX5),ENSG00000154229(PRKCA),ENSG00000095303(PTGS1)	ENSG00000120129(DUSP1),ENSG00000158748(HTR6)			http://www.kegg.jp/kegg-bin/show_pathway?map04726/K04851%09%23FFFFFF,red/K00509%09%23FFFFFF,red/K04162%09%23FFFFFF,green/K00461%09%23FFFFFF,red/K00274%09%23FFFFFF,red/K02677%09%23FFFFFF,red/K21278%09%23FFFFFF,green/
hsa04919	Thyroid hormone signaling pathway	Organismal Systems	Endocrine system	5	2	7	113	0.0842679	0.337072	ENSG00000184009(ACTG1),ENSG00000074181(NOTCH3),ENSG00000075624(ACTB),ENSG00000154229(PRKCA),ENSG00000211448(DIO2)	ENSG00000069849(ATP1B3),ENSG00000132906(CASP9)			http://www.kegg.jp/kegg-bin/show_pathway?map04919/K05692%09%23FFFFFF,red/K20995%09%23FFFFFF,red/K17904%09%23FFFFFF,red/K01540%09%23FFFFFF,green/K02677%09%23FFFFFF,red/K04399%09%23FFFFFF,green/
hsa04910	Insulin signaling pathway	Organismal Systems	Endocrine system	1	7	8	136	0.0856855	0.337915	ENSG00000169710(FASN)	ENSG00000109819(PPARGC1A),ENSG00000187840(EIF4EBP1),ENSG00000152270(PDE3B),ENSG00000169885(CALML6),ENSG00000079435(LIPE),ENSG00000185950(IRS2),ENSG00000100889(PCK2)			http://www.kegg.jp/kegg-bin/show_pathway?map04910/K00665%09%23FFFFFF,red/K01596%09%23FFFFFF,green/K13296%09%23FFFFFF,green/K07187%09%23FFFFFF,green/K07205%09%23FFFFFF,green/K07202%09%23FFFFFF,green/K02183%09%23FFFFFF,green/K07188%09%23FFFFFF,green/
hsa00730	Thiamine metabolism	Metabolism	Metabolism of cofactors and vitamins	0	2	2	15	0.087824	0.33932	-	ENSG00000163286(ALPG),ENSG00000162551(ALPL)			http://www.kegg.jp/kegg-bin/show_pathway?map00730/K01077%09%23FFFFFF,green/
hsa04260	Cardiac muscle contraction	Organismal Systems	Circulatory system	2	3	5	71	0.0884656	0.33932	ENSG00000126267(COX6B1),ENSG00000157388(CACNA1D)	ENSG00000160471(COX6B2),ENSG00000069849(ATP1B3),ENSG00000153956(CACNA2D1)			http://www.kegg.jp/kegg-bin/show_pathway?map04260/K04851%09%23FFFFFF,red/K04858%09%23FFFFFF,green/K02267%09%23FFFFFF,purple/K01540%09%23FFFFFF,green/
hsa05150	Staphylococcus aureus infection	Human Diseases	Infectious diseases: Bacterial	3	1	4	51	0.0900837	0.340857	ENSG00000182326(C1S),ENSG00000159403(C1R),ENSG00000110876(SELPLG)	ENSG00000000971(CFH)			http://www.kegg.jp/kegg-bin/show_pathway?map05150/K01330%09%23FFFFFF,red/K01331%09%23FFFFFF,red/K06544%09%23FFFFFF,red/K04004%09%23FFFFFF,green/
hsa05016	Huntington's disease	Human Diseases	Neurodegenerative diseases	4	6	10	185	0.0919091	0.343127	ENSG00000198959(TGM2),ENSG00000126267(COX6B1),ENSG00000039139(DNAH5),ENSG00000213585(VDAC1)	ENSG00000109819(PPARGC1A),ENSG00000160471(COX6B2),ENSG00000132906(CASP9),ENSG00000173805(HAP1),ENSG00000146592(CREB5),ENSG00000185633(NDUFA4L2)			http://www.kegg.jp/kegg-bin/show_pathway?map05016/K05625%09%23FFFFFF,red/K10408%09%23FFFFFF,red/K02267%09%23FFFFFF,purple/K03948%09%23FFFFFF,green/K05862%09%23FFFFFF,red/K07202%09%23FFFFFF,green/K04647%09%23FFFFFF,green/K09047%09%23FFFFFF,green/K04399%09%23FFFFFF,green/
hsa04621	NOD-like receptor signaling pathway	Organismal Systems	Immune system	4	5	9	167	0.107581	0.391116	ENSG00000213585(VDAC1),ENSG00000132357(CARD6),ENSG00000080824(HSP90AA1),ENSG00000163739(CXCL1)	ENSG00000136244(IL6),ENSG00000265972(TXNIP),ENSG00000081041(CXCL2),ENSG00000118503(TNFAIP3),ENSG00000125826(RBCK1)			http://www.kegg.jp/kegg-bin/show_pathway?map04621/K05505%09%23FFFFFF,purple/K20910%09%23FFFFFF,green/K04079%09%23FFFFFF,red/K12797%09%23FFFFFF,red/K05862%09%23FFFFFF,red/K05405%09%23FFFFFF,green/K10630%09%23FFFFFF,green/K11859%09%23FFFFFF,green/
hsa00910	Nitrogen metabolism	Metabolism	Energy metabolism	1	1	2	17	0.108954	0.391116	ENSG00000074410(CA12)	ENSG00000107159(CA9)			http://www.kegg.jp/kegg-bin/show_pathway?map00910/K01672%09%23FFFFFF,purple/
hsa00450	Selenocompound metabolism	Metabolism	Metabolism of other amino acids	0	2	2	17	0.108954	0.391116	-	ENSG00000166986(MARS),ENSG00000116761(CTH)			http://www.kegg.jp/kegg-bin/show_pathway?map00450/K01758%09%23FFFFFF,green/K01874%09%23FFFFFF,green/
hsa04932	Non-alcoholic fatty liver disease (NAFLD)	Human Diseases	Endocrine and metabolic diseases	1	7	8	145	0.112921	0.393399	ENSG00000126267(COX6B1)	ENSG00000175197(DDIT3),ENSG00000160471(COX6B2),ENSG00000136244(IL6),ENSG00000009950(MLXIPL),ENSG00000245848(CEBPA),ENSG00000185950(IRS2),ENSG00000185633(NDUFA4L2)			http://www.kegg.jp/kegg-bin/show_pathway?map04932/K07187%09%23FFFFFF,green/K04452%09%23FFFFFF,green/K05405%09%23FFFFFF,green/K02267%09%23FFFFFF,purple/K09055%09%23FFFFFF,green/K03948%09%23FFFFFF,green/K09113%09%23FFFFFF,green/
hsa05231	Choline metabolism in cancer	Human Diseases	Cancers: Overview	3	3	6	99	0.113805	0.393399	ENSG00000129219(PLD2),ENSG00000157680(DGKI),ENSG00000154229(PRKCA)	ENSG00000187840(EIF4EBP1),ENSG00000197208(SLC22A4),ENSG00000125772(GPCPD1)			http://www.kegg.jp/kegg-bin/show_pathway?map05231/K07205%09%23FFFFFF,green/K18695%09%23FFFFFF,green/K01115%09%23FFFFFF,red/K00901%09%23FFFFFF,red/K02677%09%23FFFFFF,red/K08202%09%23FFFFFF,green/
hsa04933	AGE-RAGE signaling pathway in diabetic complications	Human Diseases	Endocrine and metabolic diseases	4	2	6	99	0.113805	0.393399	ENSG00000115414(FN1),ENSG00000117525(F3),ENSG00000154229(PRKCA),ENSG00000197565(COL4A6)	ENSG00000136244(IL6),ENSG00000112715(VEGFA)			http://www.kegg.jp/kegg-bin/show_pathway?map04933/K05717%09%23FFFFFF,red/K06237%09%23FFFFFF,red/K05405%09%23FFFFFF,green/K05448%09%23FFFFFF,green/K03901%09%23FFFFFF,red/K02677%09%23FFFFFF,red/
hsa00350	Tyrosine metabolism	Metabolism	Amino acid metabolism	2	1	3	36	0.117895	0.401904	ENSG00000108602(ALDH3A1),ENSG00000069535(MAOB)	ENSG00000120053(GOT1)			http://www.kegg.jp/kegg-bin/show_pathway?map00350/K00129%09%23FFFFFF,red/K14454%09%23FFFFFF,green/K00274%09%23FFFFFF,red/
hsa04010	MAPK signaling pathway	Environmental Information Processing	Signal transduction	7	7	14	295	0.119136	0.401904	ENSG00000109971(HSPA8),ENSG00000153233(PTPRR),ENSG00000204388(HSPA1B),ENSG00000157388(CACNA1D),ENSG00000106211(HSPB1),ENSG00000160867(FGFR4),ENSG00000154229(PRKCA)	ENSG00000175197(DDIT3),ENSG00000120129(DUSP1),ENSG00000099860(GADD45B),ENSG00000112715(VEGFA),ENSG00000116717(GADD45A),ENSG00000153956(CACNA2D1),ENSG00000138166(DUSP5)			http://www.kegg.jp/kegg-bin/show_pathway?map04010/K04458%09%23FFFFFF,red/K04452%09%23FFFFFF,green/K05095%09%23FFFFFF,red/K05448%09%23FFFFFF,green/K04858%09%23FFFFFF,green/K04402%09%23FFFFFF,green/K21278%09%23FFFFFF,green/K04851%09%23FFFFFF,red/K03283%09%23FFFFFF,red/K04459%09%23FFFFFF,green/K04455%09%23FFFFFF,red/K02677%09%23FFFFFF,red/
hsa05216	Thyroid cancer	Human Diseases	Cancers: Specific types	0	3	3	37	0.125293	0.417644	-	ENSG00000099860(GADD45B),ENSG00000138795(LEF1),ENSG00000116717(GADD45A)			http://www.kegg.jp/kegg-bin/show_pathway?map05216/K04492%09%23FFFFFF,green/K04402%09%23FFFFFF,green/
hsa05213	Endometrial cancer	Human Diseases	Cancers: Specific types	0	4	4	58	0.128245	0.420518	-	ENSG00000099860(GADD45B),ENSG00000132906(CASP9),ENSG00000138795(LEF1),ENSG00000116717(GADD45A)			http://www.kegg.jp/kegg-bin/show_pathway?map05213/K04492%09%23FFFFFF,green/K04402%09%23FFFFFF,green/K04399%09%23FFFFFF,green/
hsa05204	Chemical carcinogenesis	Human Diseases	Cancers: Overview	4	1	5	80	0.129159	0.420518	ENSG00000143819(EPHX1),ENSG00000108602(ALDH3A1),ENSG00000168765(GSTM4),ENSG00000143198(MGST3)	ENSG00000065621(GSTO2)			http://www.kegg.jp/kegg-bin/show_pathway?map05204/K00129%09%23FFFFFF,red/K00799%09%23FFFFFF,purple/K01253%09%23FFFFFF,red/
hsa04921	Oxytocin signaling pathway	Organismal Systems	Endocrine system	5	3	8	152	0.136984	0.440868	ENSG00000101335(MYL9),ENSG00000184009(ACTG1),ENSG00000157388(CACNA1D),ENSG00000075624(ACTB),ENSG00000154229(PRKCA)	ENSG00000169885(CALML6),ENSG00000153956(CACNA2D1),ENSG00000101096(NFATC2)			http://www.kegg.jp/kegg-bin/show_pathway?map04921/K04851%09%23FFFFFF,red/K17332%09%23FFFFFF,green/K02183%09%23FFFFFF,green/K04858%09%23FFFFFF,green/K05692%09%23FFFFFF,red/K12755%09%23FFFFFF,red/K02677%09%23FFFFFF,red/
hsa00140	Steroid hormone biosynthesis	Metabolism	Lipid metabolism	4	0	4	60	0.140216	0.446141	ENSG00000187134(AKR1C1),ENSG00000151632(AKR1C2),ENSG00000145545(SRD5A1),ENSG00000196139(AKR1C3)	-			http://www.kegg.jp/kegg-bin/show_pathway?map00140/K12343%09%23FFFFFF,red/K00089%09%23FFFFFF,red/K00212%09%23FFFFFF,red/K04119%09%23FFFFFF,red/
hsa04216	Ferroptosis	Cellular Processes	Cell growth and death	2	1	3	40	0.14843	0.460817	ENSG00000100292(HMOX1),ENSG00000115107(STEAP3)	ENSG00000140941(MAP1LC3B)			http://www.kegg.jp/kegg-bin/show_pathway?map04216/K10435%09%23FFFFFF,green/K10142%09%23FFFFFF,red/K00510%09%23FFFFFF,red/
hsa05217	Basal cell carcinoma	Human Diseases	Cancers: Specific types	0	4	4	62	0.152612	0.460817	-	ENSG00000099860(GADD45B),ENSG00000125845(BMP2),ENSG00000138795(LEF1),ENSG00000116717(GADD45A)			http://www.kegg.jp/kegg-bin/show_pathway?map05217/K21283%09%23FFFFFF,green/K04492%09%23FFFFFF,green/K04402%09%23FFFFFF,green/
hsa00220	Arginine biosynthesis	Metabolism	Amino acid metabolism	0	2	2	21	0.154465	0.460817	-	ENSG00000120053(GOT1),ENSG00000166123(GPT2)			http://www.kegg.jp/kegg-bin/show_pathway?map00220/K14454%09%23FFFFFF,green/K00814%09%23FFFFFF,green/
hsa04727	GABAergic synapse	Organismal Systems	Nervous system	3	2	5	85	0.154855	0.460817	ENSG00000102287(GABRE),ENSG00000157388(CACNA1D),ENSG00000154229(PRKCA)	ENSG00000173805(HAP1),ENSG00000134294(SLC38A2)			http://www.kegg.jp/kegg-bin/show_pathway?map04727/K04851%09%23FFFFFF,red/K05185%09%23FFFFFF,red/K04647%09%23FFFFFF,green/K14207%09%23FFFFFF,green/K02677%09%23FFFFFF,red/
hsa04911	Insulin secretion	Organismal Systems	Endocrine system	2	3	5	85	0.154855	0.460817	ENSG00000157388(CACNA1D),ENSG00000154229(PRKCA)	ENSG00000069849(ATP1B3),ENSG00000133019(CHRM3),ENSG00000146592(CREB5)			http://www.kegg.jp/kegg-bin/show_pathway?map04911/K04131%09%23FFFFFF,green/K04851%09%23FFFFFF,red/K01540%09%23FFFFFF,green/K09047%09%23FFFFFF,green/K02677%09%23FFFFFF,red/
hsa00400	Phenylalanine, tyrosine and tryptophan biosynthesis	Metabolism	Amino acid metabolism	0	1	1	5	0.156286	0.460817	-	ENSG00000120053(GOT1)			http://www.kegg.jp/kegg-bin/show_pathway?map00400/K14454%09%23FFFFFF,green/
hsa04020	Calcium signaling pathway	Environmental Information Processing	Signal transduction	5	4	9	182	0.156349	0.460817	ENSG00000058668(ATP2B4),ENSG00000181104(F2R),ENSG00000157388(CACNA1D),ENSG00000213585(VDAC1),ENSG00000154229(PRKCA)	ENSG00000158748(HTR6),ENSG00000101188(NTSR1),ENSG00000169885(CALML6),ENSG00000133019(CHRM3)			http://www.kegg.jp/kegg-bin/show_pathway?map04020/K04162%09%23FFFFFF,green/K05862%09%23FFFFFF,red/K04851%09%23FFFFFF,red/K04131%09%23FFFFFF,green/K04211%09%23FFFFFF,green/K03914%09%23FFFFFF,red/K05850%09%23FFFFFF,red/K02183%09%23FFFFFF,green/K02677%09%23FFFFFF,red/
hsa05131	Shigellosis	Human Diseases	Infectious diseases: Bacterial	4	0	4	64	0.165405	0.475285	ENSG00000184009(ACTG1),ENSG00000102890(ELMO3),ENSG00000075624(ACTB),ENSG00000026508(CD44)	-			http://www.kegg.jp/kegg-bin/show_pathway?map05131/K06256%09%23FFFFFF,red/K05692%09%23FFFFFF,red/K19241%09%23FFFFFF,red/
hsa04915	Estrogen signaling pathway	Organismal Systems	Endocrine system	5	2	7	135	0.166042	0.475285	ENSG00000109971(HSPA8),ENSG00000204388(HSPA1B),ENSG00000171346(KRT15),ENSG00000117984(CTSD),ENSG00000080824(HSP90AA1)	ENSG00000169885(CALML6),ENSG00000146592(CREB5)			http://www.kegg.jp/kegg-bin/show_pathway?map04915/K03283%09%23FFFFFF,red/K01379%09%23FFFFFF,red/K02183%09%23FFFFFF,green/K09047%09%23FFFFFF,green/K07604%09%23FFFFFF,red/K04079%09%23FFFFFF,red/
hsa00514	Other types of O-glycan biosynthesis	Metabolism	Glycan biosynthesis and metabolism	1	1	2	22	0.16635	0.475285	ENSG00000106003(LFNG)	ENSG00000147162(OGT)			http://www.kegg.jp/kegg-bin/show_pathway?map00514/K09667%09%23FFFFFF,green/K05948%09%23FFFFFF,red/
hsa05221	Acute myeloid leukemia	Human Diseases	Cancers: Specific types	0	4	4	65	0.171941	0.484629	-	ENSG00000132326(PER2),ENSG00000187840(EIF4EBP1),ENSG00000138795(LEF1),ENSG00000245848(CEBPA)			http://www.kegg.jp/kegg-bin/show_pathway?map05221/K07205%09%23FFFFFF,green/K04492%09%23FFFFFF,green/K09055%09%23FFFFFF,green/K02633%09%23FFFFFF,green/
hsa04060	Cytokine-cytokine receptor interaction	Environmental Information Processing	Signaling molecules and interaction	4	9	13	290	0.174198	0.484629	ENSG00000168685(IL7R),ENSG00000125657(TNFSF9),ENSG00000163739(CXCL1),ENSG00000146072(TNFRSF21)	ENSG00000136244(IL6),ENSG00000125845(BMP2),ENSG00000139269(INHBE),ENSG00000157873(TNFRSF14),ENSG00000081041(CXCL2),ENSG00000130513(GDF15),ENSG00000174564(IL20RB),ENSG00000198223(CSF2RA),ENSG00000049249(TNFRSF9)			http://www.kegg.jp/kegg-bin/show_pathway?map04060/K05146%09%23FFFFFF,green/K05505%09%23FFFFFF,purple/K05152%09%23FFFFFF,green/K05472%09%23FFFFFF,red/K05157%09%23FFFFFF,red/K21283%09%23FFFFFF,green/K05405%09%23FFFFFF,green/K22689%09%23FFFFFF,green/K05504%09%23FFFFFF,green/K05072%09%23FFFFFF,red/K05066%09%23FFFFFF,green/K05137%09%23FFFFFF,green/
hsa04371	Apelin signaling pathway	Environmental Information Processing	Signal transduction	1	6	7	137	0.174813	0.484629	ENSG00000074181(NOTCH3)	ENSG00000078142(PIK3C3),ENSG00000109819(PPARGC1A),ENSG00000152270(PDE3B),ENSG00000169885(CALML6),ENSG00000118523(CCN2),ENSG00000079435(LIPE)			http://www.kegg.jp/kegg-bin/show_pathway?map04371/K07202%09%23FFFFFF,green/K02183%09%23FFFFFF,green/K20995%09%23FFFFFF,red/K07188%09%23FFFFFF,green/K00914%09%23FFFFFF,green/K13296%09%23FFFFFF,green/K06827%09%23FFFFFF,green/
hsa04964	Proximal tubule bicarbonate reclamation	Organismal Systems	Excretory system	0	2	2	23	0.178386	0.485422	-	ENSG00000069849(ATP1B3),ENSG00000100889(PCK2)			http://www.kegg.jp/kegg-bin/show_pathway?map04964/K01596%09%23FFFFFF,green/K01540%09%23FFFFFF,green/
hsa05223	Non-small cell lung cancer	Human Diseases	Cancers: Specific types	1	3	4	66	0.178566	0.485422	ENSG00000154229(PRKCA)	ENSG00000099860(GADD45B),ENSG00000132906(CASP9),ENSG00000116717(GADD45A)			http://www.kegg.jp/kegg-bin/show_pathway?map05223/K04402%09%23FFFFFF,green/K02677%09%23FFFFFF,red/K04399%09%23FFFFFF,green/
hsa00750	Vitamin B6 metabolism	Metabolism	Metabolism of cofactors and vitamins	0	1	1	6	0.184487	0.494066	-	ENSG00000135069(PSAT1)			http://www.kegg.jp/kegg-bin/show_pathway?map00750/K00831%09%23FFFFFF,green/
hsa04612	Antigen processing and presentation	Organismal Systems	Immune system	4	0	4	67	0.185275	0.494066	ENSG00000109971(HSPA8),ENSG00000204388(HSPA1B),ENSG00000163131(CTSS),ENSG00000080824(HSP90AA1)	-			http://www.kegg.jp/kegg-bin/show_pathway?map04612/K03283%09%23FFFFFF,red/K01368%09%23FFFFFF,red/K04079%09%23FFFFFF,red/
hsa03050	Proteasome	Genetic Information Processing	Folding, sorting and degradation	3	0	3	45	0.189652	0.496286	ENSG00000277791(PSMB3),ENSG00000175166(PSMD2),ENSG00000173692(PSMD1)	-			http://www.kegg.jp/kegg-bin/show_pathway?map03050/K03028%09%23FFFFFF,red/K03032%09%23FFFFFF,red/K02735%09%23FFFFFF,red/
hsa04961	Endocrine and other factor-regulated calcium reabsorption	Organismal Systems	Excretory system	2	1	3	45	0.189652	0.496286	ENSG00000197959(DNM3),ENSG00000154229(PRKCA)	ENSG00000069849(ATP1B3)			http://www.kegg.jp/kegg-bin/show_pathway?map04961/K01528%09%23FFFFFF,red/K01540%09%23FFFFFF,green/K02677%09%23FFFFFF,red/
hsa05164	Influenza A	Human Diseases	Infectious diseases: Viral	6	2	8	167	0.196251	0.504123	ENSG00000109971(HSPA8),ENSG00000184009(ACTG1),ENSG00000204388(HSPA1B),ENSG00000213585(VDAC1),ENSG00000075624(ACTB),ENSG00000154229(PRKCA)	ENSG00000136244(IL6),ENSG00000132906(CASP9)			http://www.kegg.jp/kegg-bin/show_pathway?map05164/K03283%09%23FFFFFF,red/K05862%09%23FFFFFF,red/K05405%09%23FFFFFF,green/K05692%09%23FFFFFF,red/K02677%09%23FFFFFF,red/K04399%09%23FFFFFF,green/
hsa04261	Adrenergic signaling in cardiomyocytes	Organismal Systems	Circulatory system	3	4	7	142	0.197574	0.504123	ENSG00000058668(ATP2B4),ENSG00000157388(CACNA1D),ENSG00000154229(PRKCA)	ENSG00000069849(ATP1B3),ENSG00000169885(CALML6),ENSG00000146592(CREB5),ENSG00000153956(CACNA2D1)			http://www.kegg.jp/kegg-bin/show_pathway?map04261/K04851%09%23FFFFFF,red/K05850%09%23FFFFFF,red/K02183%09%23FFFFFF,green/K04858%09%23FFFFFF,green/K01540%09%23FFFFFF,green/K09047%09%23FFFFFF,green/K02677%09%23FFFFFF,red/
hsa04930	Type II diabetes mellitus	Human Diseases	Endocrine and metabolic diseases	2	1	3	46	0.198224	0.504123	ENSG00000067225(PKM),ENSG00000157388(CACNA1D)	ENSG00000185950(IRS2)			http://www.kegg.jp/kegg-bin/show_pathway?map04930/K07187%09%23FFFFFF,green/K04851%09%23FFFFFF,red/K00873%09%23FFFFFF,red/
hsa04912	GnRH signaling pathway	Organismal Systems	Endocrine system	3	2	5	93	0.199849	0.504123	ENSG00000129219(PLD2),ENSG00000157388(CACNA1D),ENSG00000154229(PRKCA)	ENSG00000169885(CALML6),ENSG00000135346(CGA)			http://www.kegg.jp/kegg-bin/show_pathway?map04912/K04851%09%23FFFFFF,red/K02183%09%23FFFFFF,green/K01115%09%23FFFFFF,red/K08522%09%23FFFFFF,green/K02677%09%23FFFFFF,red/
hsa04520	Adherens junction	Cellular Processes	Cellular community - eukaryotes	2	2	4	70	0.205871	0.512503	ENSG00000184009(ACTG1),ENSG00000075624(ACTB)	ENSG00000010810(FYN),ENSG00000138795(LEF1)			http://www.kegg.jp/kegg-bin/show_pathway?map04520/K05703%09%23FFFFFF,green/K04492%09%23FFFFFF,green/K05692%09%23FFFFFF,red/
hsa00565	Ether lipid metabolism	Metabolism	Lipid metabolism	2	1	3	47	0.206888	0.512503	ENSG00000129219(PLD2),ENSG00000087253(LPCAT2)	ENSG00000153982(GDPD1)			http://www.kegg.jp/kegg-bin/show_pathway?map00565/K01115%09%23FFFFFF,red/K13510%09%23FFFFFF,red/K22387%09%23FFFFFF,green/
hsa05215	Prostate cancer	Human Diseases	Cancers: Specific types	1	4	5	95	0.211737	0.512503	ENSG00000080824(HSP90AA1)	ENSG00000132906(CASP9),ENSG00000138795(LEF1),ENSG00000146592(CREB5),ENSG00000244405(ETV5)			http://www.kegg.jp/kegg-bin/show_pathway?map05215/K15593%09%23FFFFFF,green/K04492%09%23FFFFFF,green/K09047%09%23FFFFFF,green/K04399%09%23FFFFFF,green/K04079%09%23FFFFFF,red/
hsa04913	Ovarian steroidogenesis	Organismal Systems	Endocrine system	2	1	3	48	0.215634	0.512503	ENSG00000012779(ALOX5),ENSG00000196139(AKR1C3)	ENSG00000135346(CGA)			http://www.kegg.jp/kegg-bin/show_pathway?map04913/K00461%09%23FFFFFF,red/K08522%09%23FFFFFF,green/K04119%09%23FFFFFF,red/
hsa04713	Circadian entrainment	Organismal Systems	Environmental adaptation	2	3	5	96	0.217765	0.512503	ENSG00000157388(CACNA1D),ENSG00000154229(PRKCA)	ENSG00000132326(PER2),ENSG00000169885(CALML6),ENSG00000049246(PER3)			http://www.kegg.jp/kegg-bin/show_pathway?map04713/K04851%09%23FFFFFF,red/K21945%09%23FFFFFF,green/K02183%09%23FFFFFF,green/K02633%09%23FFFFFF,green/K02677%09%23FFFFFF,red/
hsa04066	HIF-1 signaling pathway	Environmental Information Processing	Signal transduction	2	3	5	96	0.217765	0.512503	ENSG00000154229(PRKCA),ENSG00000100292(HMOX1)	ENSG00000187840(EIF4EBP1),ENSG00000136244(IL6),ENSG00000112715(VEGFA)			http://www.kegg.jp/kegg-bin/show_pathway?map04066/K07205%09%23FFFFFF,green/K05405%09%23FFFFFF,green/K05448%09%23FFFFFF,green/K02677%09%23FFFFFF,red/K00510%09%23FFFFFF,red/
hsa05169	Epstein-Barr virus infection	Human Diseases	Infectious diseases: Viral	3	6	9	198	0.218153	0.512503	ENSG00000026508(CD44),ENSG00000175166(PSMD2),ENSG00000173692(PSMD1)	ENSG00000069869(NEDD4),ENSG00000136244(IL6),ENSG00000099860(GADD45B),ENSG00000116717(GADD45A),ENSG00000132906(CASP9),ENSG00000118503(TNFAIP3)			http://www.kegg.jp/kegg-bin/show_pathway?map05169/K06256%09%23FFFFFF,red/K03028%09%23FFFFFF,red/K10591%09%23FFFFFF,green/K03032%09%23FFFFFF,red/K04402%09%23FFFFFF,green/K05405%09%23FFFFFF,green/K11859%09%23FFFFFF,green/K04399%09%23FFFFFF,green/
hsa04918	Thyroid hormone synthesis	Organismal Systems	Endocrine system	1	3	4	72	0.219955	0.512503	ENSG00000154229(PRKCA)	ENSG00000069849(ATP1B3),ENSG00000146592(CREB5),ENSG00000135346(CGA)			http://www.kegg.jp/kegg-bin/show_pathway?map04918/K01540%09%23FFFFFF,green/K09047%09%23FFFFFF,green/K08522%09%23FFFFFF,green/K02677%09%23FFFFFF,red/
hsa04611	Platelet activation	Organismal Systems	Immune system	5	1	6	122	0.223671	0.512503	ENSG00000181104(F2R),ENSG00000075624(ACTB),ENSG00000164171(ITGA2),ENSG00000184009(ACTG1),ENSG00000095303(PTGS1)	ENSG00000010810(FYN)			http://www.kegg.jp/kegg-bin/show_pathway?map04611/K00509%09%23FFFFFF,red/K05703%09%23FFFFFF,green/K03914%09%23FFFFFF,red/K05692%09%23FFFFFF,red/K06481%09%23FFFFFF,red/
hsa00564	Glycerophospholipid metabolism	Metabolism	Lipid metabolism	4	1	5	97	0.223846	0.512503	ENSG00000129219(PLD2),ENSG00000087253(LPCAT2),ENSG00000157680(DGKI),ENSG00000032444(PNPLA6)	ENSG00000125772(GPCPD1)			http://www.kegg.jp/kegg-bin/show_pathway?map00564/K14676%09%23FFFFFF,red/K18695%09%23FFFFFF,green/K01115%09%23FFFFFF,red/K00901%09%23FFFFFF,red/K13510%09%23FFFFFF,red/
hsa00601	Glycosphingolipid biosynthesis - lacto and neolacto series	Metabolism	Glycan biosynthesis and metabolism	1	1	2	27	0.227596	0.512503	ENSG00000179913(B3GNT3)	ENSG00000174951(FUT1)			http://www.kegg.jp/kegg-bin/show_pathway?map00601/K07970%09%23FFFFFF,red/K00718%09%23FFFFFF,green/
hsa05152	Tuberculosis	Human Diseases	Infectious diseases: Bacterial	3	5	8	175	0.231551	0.512503	ENSG00000153246(PLA2R1),ENSG00000117984(CTSD),ENSG00000163131(CTSS)	ENSG00000153879(CEBPG),ENSG00000078142(PIK3C3),ENSG00000136244(IL6),ENSG00000132906(CASP9),ENSG00000169885(CALML6)			http://www.kegg.jp/kegg-bin/show_pathway?map05152/K10049%09%23FFFFFF,green/K06560%09%23FFFFFF,red/K01379%09%23FFFFFF,red/K00914%09%23FFFFFF,green/K01368%09%23FFFFFF,red/K05405%09%23FFFFFF,green/K02183%09%23FFFFFF,green/K04399%09%23FFFFFF,green/
hsa04360	Axon guidance	Organismal Systems	Development	3	5	8	175	0.231551	0.512503	ENSG00000153993(SEMA3D),ENSG00000075223(SEMA3C),ENSG00000154229(PRKCA)	ENSG00000010810(FYN),ENSG00000137872(SEMA6D),ENSG00000163995(ABLIM2),ENSG00000107731(UNC5B),ENSG00000101096(NFATC2)			http://www.kegg.jp/kegg-bin/show_pathway?map04360/K17332%09%23FFFFFF,green/K05703%09%23FFFFFF,green/K07520%09%23FFFFFF,green/K06840%09%23FFFFFF,red/K06842%09%23FFFFFF,green/K07521%09%23FFFFFF,green/K02677%09%23FFFFFF,red/
hsa05110	Vibrio cholerae infection	Human Diseases	Infectious diseases: Bacterial	3	0	3	50	0.23335	0.512503	ENSG00000184009(ACTG1),ENSG00000075624(ACTB),ENSG00000154229(PRKCA)	-			http://www.kegg.jp/kegg-bin/show_pathway?map05110/K05692%09%23FFFFFF,red/K02677%09%23FFFFFF,red/
hsa00330	Arginine and proline metabolism	Metabolism	Amino acid metabolism	2	1	3	50	0.23335	0.512503	ENSG00000069535(MAOB),ENSG00000137124(ALDH1B1)	ENSG00000120053(GOT1)			http://www.kegg.jp/kegg-bin/show_pathway?map00330/K14454%09%23FFFFFF,green/K00128%09%23FFFFFF,red/K00274%09%23FFFFFF,red/
hsa04971	Gastric acid secretion	Organismal Systems	Digestive system	1	3	4	74	0.234287	0.512503	ENSG00000154229(PRKCA)	ENSG00000069849(ATP1B3),ENSG00000169885(CALML6),ENSG00000133019(CHRM3)			http://www.kegg.jp/kegg-bin/show_pathway?map04971/K04131%09%23FFFFFF,green/K02183%09%23FFFFFF,green/K01540%09%23FFFFFF,green/K02677%09%23FFFFFF,red/
hsa05212	Pancreatic cancer	Human Diseases	Cancers: Specific types	0	4	4	74	0.234287	0.512503	-	ENSG00000099860(GADD45B),ENSG00000112715(VEGFA),ENSG00000116717(GADD45A),ENSG00000132906(CASP9)			http://www.kegg.jp/kegg-bin/show_pathway?map05212/K05448%09%23FFFFFF,green/K04402%09%23FFFFFF,green/K04399%09%23FFFFFF,green/
hsa04070	Phosphatidylinositol signaling system	Environmental Information Processing	Signal transduction	2	3	5	99	0.236157	0.512588	ENSG00000157680(DGKI),ENSG00000154229(PRKCA)	ENSG00000078142(PIK3C3),ENSG00000102043(MTMR8),ENSG00000169885(CALML6)			http://www.kegg.jp/kegg-bin/show_pathway?map04070/K18083%09%23FFFFFF,green/K02183%09%23FFFFFF,green/K00901%09%23FFFFFF,red/K00914%09%23FFFFFF,green/K02677%09%23FFFFFF,red/
hsa05214	Glioma	Human Diseases	Cancers: Specific types	1	3	4	75	0.241536	0.520231	ENSG00000154229(PRKCA)	ENSG00000099860(GADD45B),ENSG00000169885(CALML6),ENSG00000116717(GADD45A)			http://www.kegg.jp/kegg-bin/show_pathway?map05214/K02183%09%23FFFFFF,green/K04402%09%23FFFFFF,green/K02677%09%23FFFFFF,red/
hsa04015	Rap1 signaling pathway	Environmental Information Processing	Signal transduction	7	2	9	205	0.247817	0.527833	ENSG00000128512(DOCK4),ENSG00000184009(ACTG1),ENSG00000125968(ID1),ENSG00000181104(F2R),ENSG00000160867(FGFR4),ENSG00000075624(ACTB),ENSG00000154229(PRKCA)	ENSG00000169885(CALML6),ENSG00000112715(VEGFA)			http://www.kegg.jp/kegg-bin/show_pathway?map04015/K05095%09%23FFFFFF,red/K05448%09%23FFFFFF,green/K17697%09%23FFFFFF,red/K04680%09%23FFFFFF,red/K03914%09%23FFFFFF,red/K05692%09%23FFFFFF,red/K02183%09%23FFFFFF,green/K02677%09%23FFFFFF,red/
hsa05133	Pertussis	Human Diseases	Infectious diseases: Bacterial	2	2	4	76	0.248836	0.527833	ENSG00000182326(C1S),ENSG00000159403(C1R)	ENSG00000136244(IL6),ENSG00000169885(CALML6)			http://www.kegg.jp/kegg-bin/show_pathway?map05133/K01330%09%23FFFFFF,red/K05405%09%23FFFFFF,green/K02183%09%23FFFFFF,green/K01331%09%23FFFFFF,red/
hsa05012	Parkinson's disease	Human Diseases	Neurodegenerative diseases	2	4	6	129	0.26246	0.549795	ENSG00000126267(COX6B1),ENSG00000213585(VDAC1)	ENSG00000160471(COX6B2),ENSG00000132906(CASP9),ENSG00000170775(GPR37),ENSG00000185633(NDUFA4L2)			http://www.kegg.jp/kegg-bin/show_pathway?map05012/K05862%09%23FFFFFF,red/K02267%09%23FFFFFF,purple/K03948%09%23FFFFFF,green/K04243%09%23FFFFFF,green/K04399%09%23FFFFFF,green/
hsa00983	Drug metabolism - other enzymes	Metabolism	Xenobiotics biodegradation and metabolism	3	1	4	78	0.263572	0.549795	ENSG00000168765(GSTM4),ENSG00000143198(MGST3),ENSG00000158825(CDA)	ENSG00000065621(GSTO2)			http://www.kegg.jp/kegg-bin/show_pathway?map00983/K01489%09%23FFFFFF,red/K00799%09%23FFFFFF,purple/
hsa00030	Pentose phosphate pathway	Metabolism	Carbohydrate metabolism	2	0	2	30	0.26508	0.549795	ENSG00000160211(G6PD),ENSG00000105220(GPI)	-			http://www.kegg.jp/kegg-bin/show_pathway?map00030/K00036%09%23FFFFFF,red/K01810%09%23FFFFFF,red/
hsa01521	EGFR tyrosine kinase inhibitor resistance	Human Diseases	Drug resistance: Antineoplastic	1	3	4	79	0.271001	0.557944	ENSG00000154229(PRKCA)	ENSG00000187840(EIF4EBP1),ENSG00000136244(IL6),ENSG00000112715(VEGFA)			http://www.kegg.jp/kegg-bin/show_pathway?map01521/K07205%09%23FFFFFF,green/K05405%09%23FFFFFF,green/K05448%09%23FFFFFF,green/K02677%09%23FFFFFF,red/
hsa05162	Measles	Human Diseases	Infectious diseases: Viral	3	3	6	131	0.273856	0.559705	ENSG00000147065(MSN),ENSG00000109971(HSPA8),ENSG00000204388(HSPA1B)	ENSG00000010810(FYN),ENSG00000136244(IL6),ENSG00000118503(TNFAIP3)			http://www.kegg.jp/kegg-bin/show_pathway?map05162/K03283%09%23FFFFFF,red/K05405%09%23FFFFFF,green/K05703%09%23FFFFFF,green/K11859%09%23FFFFFF,green/K05763%09%23FFFFFF,red/
hsa00410	beta-Alanine metabolism	Metabolism	Metabolism of other amino acids	2	0	2	31	0.277594	0.563235	ENSG00000108602(ALDH3A1),ENSG00000137124(ALDH1B1)	-			http://www.kegg.jp/kegg-bin/show_pathway?map00410/K00129%09%23FFFFFF,red/K00128%09%23FFFFFF,red/
hsa05167	Kaposi's sarcoma-associated herpesvirus infection	Human Diseases	Infectious diseases: Viral	1	7	8	186	0.283321	0.568268	ENSG00000163739(CXCL1)	ENSG00000078142(PIK3C3),ENSG00000136244(IL6),ENSG00000132906(CASP9),ENSG00000169885(CALML6),ENSG00000081041(CXCL2),ENSG00000112715(VEGFA),ENSG00000101096(NFATC2)			http://www.kegg.jp/kegg-bin/show_pathway?map05167/K05505%09%23FFFFFF,purple/K05405%09%23FFFFFF,green/K17332%09%23FFFFFF,green/K02183%09%23FFFFFF,green/K05448%09%23FFFFFF,green/K00914%09%23FFFFFF,green/K04399%09%23FFFFFF,green/
hsa04668	TNF signaling pathway	Environmental Information Processing	Signal transduction	1	4	5	107	0.287048	0.568268	ENSG00000163739(CXCL1)	ENSG00000136244(IL6),ENSG00000081041(CXCL2),ENSG00000146592(CREB5),ENSG00000118503(TNFAIP3)			http://www.kegg.jp/kegg-bin/show_pathway?map04668/K05505%09%23FFFFFF,purple/K05405%09%23FFFFFF,green/K11859%09%23FFFFFF,green/K09047%09%23FFFFFF,green/
hsa03013	RNA transport	Genetic Information Processing	Translation	2	5	7	160	0.287558	0.568268	ENSG00000055163(CYFIP2),ENSG00000104356(POP1)	ENSG00000114784(EIF1B),ENSG00000187840(EIF4EBP1),ENSG00000173812(EIF1),ENSG00000184575(XPOT),ENSG00000101104(PABPC1L)			http://www.kegg.jp/kegg-bin/show_pathway?map03013/K07205%09%23FFFFFF,green/K14288%09%23FFFFFF,green/K05749%09%23FFFFFF,red/K01164%09%23FFFFFF,red/K13126%09%23FFFFFF,green/K03113%09%23FFFFFF,green/
hsa00072	Synthesis and degradation of ketone bodies	Metabolism	Lipid metabolism	1	0	1	10	0.288193	0.568268	ENSG00000161267(BDH1)	-			http://www.kegg.jp/kegg-bin/show_pathway?map00072/K00019%09%23FFFFFF,red/
hsa04144	Endocytosis	Cellular Processes	Transport and catabolism	8	2	10	244	0.299601	0.584786	ENSG00000129219(PLD2),ENSG00000197959(DNM3),ENSG00000109971(HSPA8),ENSG00000105974(CAV1),ENSG00000125637(PSD4),ENSG00000024422(EHD2),ENSG00000204388(HSPA1B),ENSG00000160867(FGFR4)	ENSG00000069869(NEDD4),ENSG00000181852(RNF41)			http://www.kegg.jp/kegg-bin/show_pathway?map04144/K05095%09%23FFFFFF,red/K10591%09%23FFFFFF,green/K12494%09%23FFFFFF,red/K11981%09%23FFFFFF,green/K03283%09%23FFFFFF,red/K01528%09%23FFFFFF,red/K01115%09%23FFFFFF,red/K06278%09%23FFFFFF,red/K12469%09%23FFFFFF,red/
hsa00051	Fructose and mannose metabolism	Metabolism	Carbohydrate metabolism	2	0	2	33	0.302568	0.584786	ENSG00000114268(PFKFB4),ENSG00000085662(AKR1B1)	-			http://www.kegg.jp/kegg-bin/show_pathway?map00051/K00011%09%23FFFFFF,red/K19030%09%23FFFFFF,red/
hsa05165	Human papillomavirus infection	Human Diseases	Infectious diseases: Viral	8	5	13	330	0.310919	0.584786	ENSG00000115221(ITGB6),ENSG00000115414(FN1),ENSG00000164171(ITGA2),ENSG00000067225(PKM),ENSG00000106003(LFNG),ENSG00000074181(NOTCH3),ENSG00000112769(LAMA4),ENSG00000197565(COL4A6)	ENSG00000188290(HES4),ENSG00000187840(EIF4EBP1),ENSG00000146592(CREB5),ENSG00000112715(VEGFA),ENSG00000092758(COL9A3)			http://www.kegg.jp/kegg-bin/show_pathway?map05165/K05717%09%23FFFFFF,red/K06237%09%23FFFFFF,red/K06589%09%23FFFFFF,red/K05448%09%23FFFFFF,green/K20995%09%23FFFFFF,red/K07205%09%23FFFFFF,green/K06241%09%23FFFFFF,red/K08131%09%23FFFFFF,green/K06481%09%23FFFFFF,red/K09089%09%23FFFFFF,green/K05948%09%23FFFFFF,red/K09047%09%23FFFFFF,green/K00873%09%23FFFFFF,red/
hsa00430	Taurine and hypotaurine metabolism	Metabolism	Metabolism of other amino acids	0	1	1	11	0.311994	0.584786	-	ENSG00000131067(GGT7)			http://www.kegg.jp/kegg-bin/show_pathway?map00430/K00681%09%23FFFFFF,green/
hsa05145	Toxoplasmosis	Human Diseases	Infectious diseases: Parasitic	4	1	5	111	0.313226	0.584786	ENSG00000109971(HSPA8),ENSG00000204388(HSPA1B),ENSG00000012779(ALOX5),ENSG00000112769(LAMA4)	ENSG00000132906(CASP9)			http://www.kegg.jp/kegg-bin/show_pathway?map05145/K03283%09%23FFFFFF,red/K06241%09%23FFFFFF,red/K00461%09%23FFFFFF,red/K04399%09%23FFFFFF,green/
hsa05010	Alzheimer's disease	Human Diseases	Neurodegenerative diseases	3	4	7	165	0.31417	0.584786	ENSG00000014216(CAPN1),ENSG00000157388(CACNA1D),ENSG00000126267(COX6B1)	ENSG00000160471(COX6B2),ENSG00000132906(CASP9),ENSG00000169885(CALML6),ENSG00000185633(NDUFA4L2)			http://www.kegg.jp/kegg-bin/show_pathway?map05010/K04851%09%23FFFFFF,red/K02183%09%23FFFFFF,green/K01367%09%23FFFFFF,red/K02267%09%23FFFFFF,purple/K03948%09%23FFFFFF,green/K04399%09%23FFFFFF,green/
hsa04130	SNARE interactions in vesicular transport	Genetic Information Processing	Folding, sorting and degradation	0	2	2	34	0.315003	0.584786	-	ENSG00000162236(STX5),ENSG00000105829(BET1)			http://www.kegg.jp/kegg-bin/show_pathway?map04130/K08504%09%23FFFFFF,green/K08490%09%23FFFFFF,green/
hsa05020	Prion diseases	Human Diseases	Neurodegenerative diseases	0	2	2	34	0.315003	0.584786	-	ENSG00000010810(FYN),ENSG00000136244(IL6)			http://www.kegg.jp/kegg-bin/show_pathway?map05020/K05405%09%23FFFFFF,green/K05703%09%23FFFFFF,green/
hsa00310	Lysine degradation	Metabolism	Amino acid metabolism	3	0	3	59	0.315366	0.584786	ENSG00000105953(OGDH),ENSG00000137124(ALDH1B1),ENSG00000083444(PLOD1)	-			http://www.kegg.jp/kegg-bin/show_pathway?map00310/K00473%09%23FFFFFF,red/K00128%09%23FFFFFF,red/K00164%09%23FFFFFF,red/
hsa04725	Cholinergic synapse	Organismal Systems	Nervous system	2	3	5	112	0.319822	0.589146	ENSG00000157388(CACNA1D),ENSG00000154229(PRKCA)	ENSG00000010810(FYN),ENSG00000133019(CHRM3),ENSG00000146592(CREB5)			http://www.kegg.jp/kegg-bin/show_pathway?map04725/K04131%09%23FFFFFF,green/K04851%09%23FFFFFF,red/K05703%09%23FFFFFF,green/K09047%09%23FFFFFF,green/K02677%09%23FFFFFF,red/
hsa05210	Colorectal cancer	Human Diseases	Cancers: Specific types	0	4	4	86	0.32382	0.592612	-	ENSG00000099860(GADD45B),ENSG00000132906(CASP9),ENSG00000138795(LEF1),ENSG00000116717(GADD45A)			http://www.kegg.jp/kegg-bin/show_pathway?map05210/K04492%09%23FFFFFF,green/K04402%09%23FFFFFF,green/K04399%09%23FFFFFF,green/
hsa04724	Glutamatergic synapse	Organismal Systems	Nervous system	4	1	5	113	0.326435	0.593518	ENSG00000129219(PLD2),ENSG00000106688(SLC1A1),ENSG00000154229(PRKCA),ENSG00000157388(CACNA1D)	ENSG00000134294(SLC38A2)			http://www.kegg.jp/kegg-bin/show_pathway?map04724/K05612%09%23FFFFFF,red/K04851%09%23FFFFFF,red/K14207%09%23FFFFFF,green/K01115%09%23FFFFFF,red/K02677%09%23FFFFFF,red/
hsa04540	Gap junction	Cellular Processes	Cellular community - eukaryotes	4	0	4	87	0.331441	0.598733	ENSG00000127824(TUBA4A),ENSG00000196230(TUBB),ENSG00000154229(PRKCA),ENSG00000167553(TUBA1C)	-			http://www.kegg.jp/kegg-bin/show_pathway?map04540/K07375%09%23FFFFFF,red/K02677%09%23FFFFFF,red/K07374%09%23FFFFFF,red/
hsa00561	Glycerolipid metabolism	Metabolism	Lipid metabolism	3	0	3	61	0.333803	0.599134	ENSG00000085662(AKR1B1),ENSG00000137124(ALDH1B1),ENSG00000157680(DGKI)	-			http://www.kegg.jp/kegg-bin/show_pathway?map00561/K00901%09%23FFFFFF,red/K00128%09%23FFFFFF,red/K00011%09%23FFFFFF,red/
hsa00500	Starch and sucrose metabolism	Metabolism	Carbohydrate metabolism	2	0	2	36	0.33971	0.605852	ENSG00000105220(GPI),ENSG00000165434(PGM2L1)	-			http://www.kegg.jp/kegg-bin/show_pathway?map00500/K01810%09%23FFFFFF,red/K11809%09%23FFFFFF,red/
hsa05230	Central carbon metabolism in cancer	Human Diseases	Cancers: Overview	2	1	3	62	0.343016	0.607877	ENSG00000067225(PKM),ENSG00000160211(G6PD)	ENSG00000105281(SLC1A5)			http://www.kegg.jp/kegg-bin/show_pathway?map05230/K00036%09%23FFFFFF,red/K05616%09%23FFFFFF,green/K00873%09%23FFFFFF,red/
hsa04072	Phospholipase D signaling pathway	Environmental Information Processing	Signal transduction	5	1	6	144	0.350186	0.608774	ENSG00000129219(PLD2),ENSG00000197959(DNM3),ENSG00000181104(F2R),ENSG00000157680(DGKI),ENSG00000154229(PRKCA)	ENSG00000010810(FYN)			http://www.kegg.jp/kegg-bin/show_pathway?map04072/K01528%09%23FFFFFF,red/K05703%09%23FFFFFF,green/K03914%09%23FFFFFF,red/K01115%09%23FFFFFF,red/K00901%09%23FFFFFF,red/K02677%09%23FFFFFF,red/
hsa04960	Aldosterone-regulated sodium reabsorption	Organismal Systems	Excretory system	1	1	2	37	0.351962	0.608774	ENSG00000154229(PRKCA)	ENSG00000069849(ATP1B3)			http://www.kegg.jp/kegg-bin/show_pathway?map04960/K01540%09%23FFFFFF,green/K02677%09%23FFFFFF,red/
hsa00590	Arachidonic acid metabolism	Metabolism	Lipid metabolism	3	0	3	63	0.352219	0.608774	ENSG00000012779(ALOX5),ENSG00000196139(AKR1C3),ENSG00000095303(PTGS1)	-			http://www.kegg.jp/kegg-bin/show_pathway?map00590/K00509%09%23FFFFFF,red/K00461%09%23FFFFFF,red/K04119%09%23FFFFFF,red/
hsa04927	Cortisol synthesis and secretion	Organismal Systems	Endocrine system	2	1	3	63	0.352219	0.608774	ENSG00000185630(PBX1),ENSG00000157388(CACNA1D)	ENSG00000146592(CREB5)			http://www.kegg.jp/kegg-bin/show_pathway?map04927/K04851%09%23FFFFFF,red/K09355%09%23FFFFFF,red/K09047%09%23FFFFFF,green/
hsa00061	Fatty acid biosynthesis	Metabolism	Lipid metabolism	1	0	1	13	0.357239	0.613663	ENSG00000169710(FASN)	-			http://www.kegg.jp/kegg-bin/show_pathway?map00061/K00665%09%23FFFFFF,red/
hsa04924	Renin secretion	Organismal Systems	Endocrine system	1	2	3	64	0.361407	0.617036	ENSG00000157388(CACNA1D)	ENSG00000152270(PDE3B),ENSG00000169885(CALML6)			http://www.kegg.jp/kegg-bin/show_pathway?map04924/K04851%09%23FFFFFF,red/K02183%09%23FFFFFF,green/K13296%09%23FFFFFF,green/
hsa04664	Fc epsilon RI signaling pathway	Organismal Systems	Immune system	2	1	3	67	0.388832	0.658956	ENSG00000012779(ALOX5),ENSG00000154229(PRKCA)	ENSG00000010810(FYN)			http://www.kegg.jp/kegg-bin/show_pathway?map04664/K05703%09%23FFFFFF,green/K00461%09%23FFFFFF,red/K02677%09%23FFFFFF,red/
hsa04972	Pancreatic secretion	Organismal Systems	Digestive system	2	2	4	95	0.392484	0.658956	ENSG00000058668(ATP2B4),ENSG00000154229(PRKCA)	ENSG00000069849(ATP1B3),ENSG00000133019(CHRM3)			http://www.kegg.jp/kegg-bin/show_pathway?map04972/K04131%09%23FFFFFF,green/K05850%09%23FFFFFF,red/K01540%09%23FFFFFF,green/K02677%09%23FFFFFF,red/
hsa04390	Hippo signaling pathway	Environmental Information Processing	Signal transduction	3	3	6	152	0.398106	0.658956	ENSG00000184009(ACTG1),ENSG00000125968(ID1),ENSG00000075624(ACTB)	ENSG00000125845(BMP2),ENSG00000138795(LEF1),ENSG00000118523(CCN2)			http://www.kegg.jp/kegg-bin/show_pathway?map04390/K04680%09%23FFFFFF,red/K21283%09%23FFFFFF,green/K04492%09%23FFFFFF,green/K05692%09%23FFFFFF,red/K06827%09%23FFFFFF,green/
hsa00603	Glycosphingolipid biosynthesis - globo and isoglobo series	Metabolism	Glycan biosynthesis and metabolism	0	1	1	15	0.399516	0.658956	-	ENSG00000174951(FUT1)			http://www.kegg.jp/kegg-bin/show_pathway?map00603/K00718%09%23FFFFFF,green/
hsa00604	Glycosphingolipid biosynthesis - ganglio series	Metabolism	Glycan biosynthesis and metabolism	1	0	1	15	0.399516	0.658956	ENSG00000135454(B4GALNT1)	-			http://www.kegg.jp/kegg-bin/show_pathway?map00604/K00725%09%23FFFFFF,red/
hsa04914	Progesterone-mediated oocyte maturation	Organismal Systems	Endocrine system	2	2	4	96	0.40008	0.658956	ENSG00000166851(PLK1),ENSG00000080824(HSP90AA1)	ENSG00000107864(CPEB3),ENSG00000152270(PDE3B)			http://www.kegg.jp/kegg-bin/show_pathway?map04914/K06631%09%23FFFFFF,red/K02602%09%23FFFFFF,green/K13296%09%23FFFFFF,green/K04079%09%23FFFFFF,red/
hsa04976	Bile secretion	Organismal Systems	Digestive system	2	1	3	69	0.406959	0.662491	ENSG00000023839(ABCC2),ENSG00000143819(EPHX1)	ENSG00000069849(ATP1B3)			http://www.kegg.jp/kegg-bin/show_pathway?map04976/K05666%09%23FFFFFF,red/K01253%09%23FFFFFF,red/K01540%09%23FFFFFF,green/
hsa04920	Adipocytokine signaling pathway	Organismal Systems	Endocrine system	0	3	3	69	0.406959	0.662491	-	ENSG00000109819(PPARGC1A),ENSG00000185950(IRS2),ENSG00000100889(PCK2)			http://www.kegg.jp/kegg-bin/show_pathway?map04920/K07187%09%23FFFFFF,green/K07202%09%23FFFFFF,green/K01596%09%23FFFFFF,green/
hsa04750	Inflammatory mediator regulation of TRP channels	Organismal Systems	Sensory system	3	1	4	99	0.422761	0.681547	ENSG00000104321(TRPA1),ENSG00000154229(PRKCA),ENSG00000164251(F2RL1)	ENSG00000169885(CALML6)			http://www.kegg.jp/kegg-bin/show_pathway?map04750/K04984%09%23FFFFFF,red/K02183%09%23FFFFFF,green/K04234%09%23FFFFFF,red/K02677%09%23FFFFFF,red/
hsa04973	Carbohydrate digestion and absorption	Organismal Systems	Digestive system	1	1	2	43	0.423533	0.681547	ENSG00000157388(CACNA1D)	ENSG00000069849(ATP1B3)			http://www.kegg.jp/kegg-bin/show_pathway?map04973/K04851%09%23FFFFFF,red/K01540%09%23FFFFFF,green/
hsa04714	Thermogenesis	Organismal Systems	Environmental adaptation	3	5	8	216	0.434355	0.68731	ENSG00000184009(ACTG1),ENSG00000126267(COX6B1),ENSG00000075624(ACTB)	ENSG00000109819(PPARGC1A),ENSG00000160471(COX6B2),ENSG00000146592(CREB5),ENSG00000079435(LIPE),ENSG00000185633(NDUFA4L2)			http://www.kegg.jp/kegg-bin/show_pathway?map04714/K07202%09%23FFFFFF,green/K05692%09%23FFFFFF,red/K02267%09%23FFFFFF,purple/K03948%09%23FFFFFF,green/K09047%09%23FFFFFF,green/K07188%09%23FFFFFF,green/
hsa00071	Fatty acid degradation	Metabolism	Lipid metabolism	1	1	2	44	0.435073	0.68731	ENSG00000137124(ALDH1B1)	ENSG00000167969(ECI1)			http://www.kegg.jp/kegg-bin/show_pathway?map00071/K13238%09%23FFFFFF,green/K00128%09%23FFFFFF,red/
hsa02010	ABC transporters	Environmental Information Processing	Membrane transport	2	0	2	44	0.435073	0.68731	ENSG00000023839(ABCC2),ENSG00000165029(ABCA1)	-			http://www.kegg.jp/kegg-bin/show_pathway?map02010/K05641%09%23FFFFFF,red/K05666%09%23FFFFFF,red/
hsa04926	Relaxin signaling pathway	Organismal Systems	Endocrine system	3	2	5	130	0.439388	0.68731	ENSG00000137745(MMP13),ENSG00000154229(PRKCA),ENSG00000197565(COL4A6)	ENSG00000146592(CREB5),ENSG00000112715(VEGFA)			http://www.kegg.jp/kegg-bin/show_pathway?map04926/K06237%09%23FFFFFF,red/K05448%09%23FFFFFF,green/K09047%09%23FFFFFF,green/K02677%09%23FFFFFF,red/K07994%09%23FFFFFF,red/
hsa04728	Dopaminergic synapse	Organismal Systems	Nervous system	3	2	5	130	0.439388	0.68731	ENSG00000069535(MAOB),ENSG00000154229(PRKCA),ENSG00000157388(CACNA1D)	ENSG00000146592(CREB5),ENSG00000169885(CALML6)			http://www.kegg.jp/kegg-bin/show_pathway?map04728/K04851%09%23FFFFFF,red/K02183%09%23FFFFFF,green/K09047%09%23FFFFFF,green/K00274%09%23FFFFFF,red/K02677%09%23FFFFFF,red/
hsa04217	Necroptosis	Cellular Processes	Cell growth and death	3	3	6	162	0.457687	0.708175	ENSG00000014216(CAPN1),ENSG00000213585(VDAC1),ENSG00000080824(HSP90AA1)	ENSG00000180573(HIST1H2AC),ENSG00000118503(TNFAIP3),ENSG00000125826(RBCK1)			http://www.kegg.jp/kegg-bin/show_pathway?map04217/K05862%09%23FFFFFF,red/K11251%09%23FFFFFF,green/K01367%09%23FFFFFF,red/K11859%09%23FFFFFF,green/K10630%09%23FFFFFF,green/K04079%09%23FFFFFF,red/
hsa00511	Other glycan degradation	Metabolism	Glycan biosynthesis and metabolism	1	0	1	18	0.457784	0.708175	ENSG00000109323(MANBA)	-			http://www.kegg.jp/kegg-bin/show_pathway?map00511/K01192%09%23FFFFFF,red/
hsa04659	Th17 cell differentiation	Organismal Systems	Immune system	1	3	4	105	0.467421	0.71911	ENSG00000080824(HSP90AA1)	ENSG00000143365(RORC),ENSG00000136244(IL6),ENSG00000101096(NFATC2)			http://www.kegg.jp/kegg-bin/show_pathway?map04659/K05405%09%23FFFFFF,green/K17332%09%23FFFFFF,green/K08534%09%23FFFFFF,green/K04079%09%23FFFFFF,red/
hsa04928	Parathyroid hormone synthesis, secretion and action	Organismal Systems	Endocrine system	3	1	4	106	0.474749	0.72639	ENSG00000129219(PLD2),ENSG00000137745(MMP13),ENSG00000154229(PRKCA)	ENSG00000146592(CREB5)			http://www.kegg.jp/kegg-bin/show_pathway?map04928/K01115%09%23FFFFFF,red/K09047%09%23FFFFFF,green/K02677%09%23FFFFFF,red/K07994%09%23FFFFFF,red/
hsa00520	Amino sugar and nucleotide sugar metabolism	Metabolism	Carbohydrate metabolism	1	1	2	48	0.479936	0.72639	ENSG00000105220(GPI)	ENSG00000198380(GFPT1)			http://www.kegg.jp/kegg-bin/show_pathway?map00520/K00820%09%23FFFFFF,green/K01810%09%23FFFFFF,red/
hsa04330	Notch signaling pathway	Environmental Information Processing	Signal transduction	2	0	2	48	0.479936	0.72639	ENSG00000106003(LFNG),ENSG00000074181(NOTCH3)	-			http://www.kegg.jp/kegg-bin/show_pathway?map04330/K05948%09%23FFFFFF,red/K20995%09%23FFFFFF,red/
hsa04550	Signaling pathways regulating pluripotency of stem cells	Cellular Processes	Cellular community - eukaryotes	2	3	5	137	0.484914	0.729978	ENSG00000125968(ID1),ENSG00000160867(FGFR4)	ENSG00000136826(KLF4),ENSG00000139269(INHBE),ENSG00000135111(TBX3)			http://www.kegg.jp/kegg-bin/show_pathway?map04550/K04680%09%23FFFFFF,red/K17846%09%23FFFFFF,green/K05095%09%23FFFFFF,red/K22689%09%23FFFFFF,green/K10177%09%23FFFFFF,green/
hsa05030	Cocaine addiction	Human Diseases	Substance dependence	1	1	2	49	0.490808	0.734899	ENSG00000069535(MAOB)	ENSG00000146592(CREB5)			http://www.kegg.jp/kegg-bin/show_pathway?map05030/K09047%09%23FFFFFF,green/K00274%09%23FFFFFF,red/
hsa05014	Amyotrophic lateral sclerosis (ALS)	Human Diseases	Neurodegenerative diseases	1	1	2	50	0.501535	0.743015	ENSG00000121691(CAT)	ENSG00000132906(CASP9)			http://www.kegg.jp/kegg-bin/show_pathway?map05014/K03781%09%23FFFFFF,red/K04399%09%23FFFFFF,green/
hsa04979	Cholesterol metabolism	Organismal Systems	Digestive system	2	0	2	50	0.501535	0.743015	ENSG00000213585(VDAC1),ENSG00000165029(ABCA1)	-			http://www.kegg.jp/kegg-bin/show_pathway?map04979/K05862%09%23FFFFFF,red/K05641%09%23FFFFFF,red/
hsa05161	Hepatitis B	Human Diseases	Infectious diseases: Viral	1	4	5	143	0.522878	0.770557	ENSG00000154229(PRKCA)	ENSG00000136244(IL6),ENSG00000132906(CASP9),ENSG00000146592(CREB5),ENSG00000101096(NFATC2)			http://www.kegg.jp/kegg-bin/show_pathway?map05161/K05405%09%23FFFFFF,green/K17332%09%23FFFFFF,green/K09047%09%23FFFFFF,green/K02677%09%23FFFFFF,red/K04399%09%23FFFFFF,green/
hsa04350	TGF-beta signaling pathway	Environmental Information Processing	Signal transduction	1	2	3	83	0.527855	0.773819	ENSG00000125968(ID1)	ENSG00000125845(BMP2),ENSG00000139269(INHBE)			http://www.kegg.jp/kegg-bin/show_pathway?map04350/K04680%09%23FFFFFF,red/K21283%09%23FFFFFF,green/K22689%09%23FFFFFF,green/
hsa04614	Renin-angiotensin system	Organismal Systems	Endocrine system	1	0	1	23	0.542631	0.789245	ENSG00000166825(ANPEP)	-			http://www.kegg.jp/kegg-bin/show_pathway?map04614/K11140%09%23FFFFFF,red/
hsa04012	ErbB signaling pathway	Environmental Information Processing	Signal transduction	1	2	3	85	0.544015	0.789245	ENSG00000154229(PRKCA)	ENSG00000187840(EIF4EBP1),ENSG00000143322(ABL2)			http://www.kegg.jp/kegg-bin/show_pathway?map04012/K07205%09%23FFFFFF,green/K08887%09%23FFFFFF,green/K02677%09%23FFFFFF,red/
hsa04310	Wnt signaling pathway	Environmental Information Processing	Signal transduction	3	2	5	148	0.553569	0.798965	ENSG00000137673(MMP7),ENSG00000100592(DAAM1),ENSG00000154229(PRKCA)	ENSG00000138795(LEF1),ENSG00000101096(NFATC2)			http://www.kegg.jp/kegg-bin/show_pathway?map04310/K17332%09%23FFFFFF,green/K04512%09%23FFFFFF,red/K04492%09%23FFFFFF,green/K01397%09%23FFFFFF,red/K02677%09%23FFFFFF,red/
hsa04071	Sphingolipid signaling pathway	Environmental Information Processing	Signal transduction	3	1	4	118	0.55923	0.802997	ENSG00000129219(PLD2),ENSG00000117984(CTSD),ENSG00000154229(PRKCA)	ENSG00000010810(FYN)			http://www.kegg.jp/kegg-bin/show_pathway?map04071/K01379%09%23FFFFFF,red/K05703%09%23FFFFFF,green/K01115%09%23FFFFFF,red/K02677%09%23FFFFFF,red/
hsa04142	Lysosome	Cellular Processes	Transport and catabolism	4	0	4	120	0.572593	0.817989	ENSG00000196743(GM2A),ENSG00000109323(MANBA),ENSG00000117984(CTSD),ENSG00000163131(CTSS)	-			http://www.kegg.jp/kegg-bin/show_pathway?map04142/K12383%09%23FFFFFF,red/K01368%09%23FFFFFF,red/K01379%09%23FFFFFF,red/K01192%09%23FFFFFF,red/
hsa05032	Morphine addiction	Human Diseases	Substance dependence	2	1	3	90	0.58297	0.828587	ENSG00000102287(GABRE),ENSG00000154229(PRKCA)	ENSG00000152270(PDE3B)			http://www.kegg.jp/kegg-bin/show_pathway?map05032/K05185%09%23FFFFFF,red/K13296%09%23FFFFFF,green/K02677%09%23FFFFFF,red/
hsa04950	Maturity onset diabetes of the young	Human Diseases	Endocrine and metabolic diseases	0	1	1	26	0.587038	0.830154	-	ENSG00000180535(BHLHA15)			http://www.kegg.jp/kegg-bin/show_pathway?map04950/K08040%09%23FFFFFF,green/
hsa04110	Cell cycle	Cellular Processes	Cell growth and death	2	2	4	124	0.598621	0.837022	ENSG00000166851(PLK1),ENSG00000129757(CDKN1C)	ENSG00000099860(GADD45B),ENSG00000116717(GADD45A)			http://www.kegg.jp/kegg-bin/show_pathway?map04110/K06631%09%23FFFFFF,red/K09993%09%23FFFFFF,red/K04402%09%23FFFFFF,green/
hsa00053	Ascorbate and aldarate metabolism	Metabolism	Carbohydrate metabolism	1	0	1	27	0.600862	0.837022	ENSG00000137124(ALDH1B1)	-			http://www.kegg.jp/kegg-bin/show_pathway?map00053/K00128%09%23FFFFFF,red/
hsa01040	Biosynthesis of unsaturated fatty acids	Metabolism	Lipid metabolism	0	1	1	27	0.600862	0.837022	-	ENSG00000170522(ELOVL6)			http://www.kegg.jp/kegg-bin/show_pathway?map01040/K10203%09%23FFFFFF,green/
hsa04650	Natural killer cell mediated cytotoxicity	Organismal Systems	Immune system	1	3	4	125	0.604979	0.838584	ENSG00000154229(PRKCA)	ENSG00000010810(FYN),ENSG00000111981(ULBP1),ENSG00000101096(NFATC2)			http://www.kegg.jp/kegg-bin/show_pathway?map04650/K17332%09%23FFFFFF,green/K05703%09%23FFFFFF,green/K07986%09%23FFFFFF,green/K02677%09%23FFFFFF,red/
hsa00650	Butanoate metabolism	Metabolism	Carbohydrate metabolism	1	0	1	28	0.614225	0.840548	ENSG00000161267(BDH1)	-			http://www.kegg.jp/kegg-bin/show_pathway?map00650/K00019%09%23FFFFFF,red/
hsa04744	Phototransduction	Organismal Systems	Sensory system	0	1	1	28	0.614225	0.840548	-	ENSG00000169885(CALML6)			http://www.kegg.jp/kegg-bin/show_pathway?map04744/K02183%09%23FFFFFF,green/
hsa05321	Inflammatory bowel disease (IBD)	Human Diseases	Immune diseases	0	2	2	62	0.618403	0.840548	-	ENSG00000143365(RORC),ENSG00000136244(IL6)			http://www.kegg.jp/kegg-bin/show_pathway?map05321/K05405%09%23FFFFFF,green/K08534%09%23FFFFFF,green/
hsa04623	Cytosolic DNA-sensing pathway	Organismal Systems	Immune system	0	2	2	62	0.618403	0.840548	-	ENSG00000136244(IL6),ENSG00000186141(POLR3C)			http://www.kegg.jp/kegg-bin/show_pathway?map04623/K05405%09%23FFFFFF,green/K03023%09%23FFFFFF,green/
hsa04721	Synaptic vesicle cycle	Organismal Systems	Nervous system	1	1	2	63	0.627131	0.848293	ENSG00000197959(DNM3)	ENSG00000130477(UNC13A)			http://www.kegg.jp/kegg-bin/show_pathway?map04721/K01528%09%23FFFFFF,red/K15293%09%23FFFFFF,green/
hsa00062	Fatty acid elongation	Metabolism	Lipid metabolism	0	1	1	30	0.639627	0.85575	-	ENSG00000170522(ELOVL6)			http://www.kegg.jp/kegg-bin/show_pathway?map00062/K10203%09%23FFFFFF,green/
hsa03020	RNA polymerase	Genetic Information Processing	Transcription	0	1	1	30	0.639627	0.85575	-	ENSG00000186141(POLR3C)			http://www.kegg.jp/kegg-bin/show_pathway?map03020/K03023%09%23FFFFFF,green/
hsa04270	Vascular smooth muscle contraction	Organismal Systems	Circulatory system	3	1	4	131	0.641813	0.85575	ENSG00000101335(MYL9),ENSG00000157388(CACNA1D),ENSG00000154229(PRKCA)	ENSG00000169885(CALML6)			http://www.kegg.jp/kegg-bin/show_pathway?map04270/K04851%09%23FFFFFF,red/K02183%09%23FFFFFF,green/K12755%09%23FFFFFF,red/K02677%09%23FFFFFF,red/
hsa00052	Galactose metabolism	Metabolism	Carbohydrate metabolism	1	0	1	31	0.651694	0.855947	ENSG00000085662(AKR1B1)	-			http://www.kegg.jp/kegg-bin/show_pathway?map00052/K00011%09%23FFFFFF,red/
hsa04720	Long-term potentiation	Organismal Systems	Nervous system	1	1	2	66	0.652382	0.855947	ENSG00000154229(PRKCA)	ENSG00000169885(CALML6)			http://www.kegg.jp/kegg-bin/show_pathway?map04720/K02183%09%23FFFFFF,green/K02677%09%23FFFFFF,red/
hsa04916	Melanogenesis	Organismal Systems	Endocrine system	1	2	3	101	0.660893	0.855947	ENSG00000154229(PRKCA)	ENSG00000138795(LEF1),ENSG00000169885(CALML6)			http://www.kegg.jp/kegg-bin/show_pathway?map04916/K02183%09%23FFFFFF,green/K04492%09%23FFFFFF,green/K02677%09%23FFFFFF,red/
hsa04014	Ras signaling pathway	Environmental Information Processing	Signal transduction	3	4	7	232	0.661188	0.855947	ENSG00000129219(PLD2),ENSG00000160867(FGFR4),ENSG00000154229(PRKCA)	ENSG00000185989(RASA3),ENSG00000169885(CALML6),ENSG00000112715(VEGFA),ENSG00000143322(ABL2)			http://www.kegg.jp/kegg-bin/show_pathway?map04014/K05095%09%23FFFFFF,red/K02183%09%23FFFFFF,green/K05448%09%23FFFFFF,green/K01115%09%23FFFFFF,red/K08887%09%23FFFFFF,green/K12380%09%23FFFFFF,green/K02677%09%23FFFFFF,red/
hsa04136	Autophagy - other	Cellular Processes	Transport and catabolism	0	1	1	32	0.663359	0.855947	-	ENSG00000078142(PIK3C3)			http://www.kegg.jp/kegg-bin/show_pathway?map04136/K00914%09%23FFFFFF,green/
hsa05332	Graft-versus-host disease	Human Diseases	Immune diseases	0	1	1	32	0.663359	0.855947	-	ENSG00000136244(IL6)			http://www.kegg.jp/kegg-bin/show_pathway?map05332/K05405%09%23FFFFFF,green/
hsa00640	Propanoate metabolism	Metabolism	Carbohydrate metabolism	1	0	1	32	0.663359	0.855947	ENSG00000134333(LDHA)	-			http://www.kegg.jp/kegg-bin/show_pathway?map00640/K00016%09%23FFFFFF,red/
hsa05340	Primary immunodeficiency	Human Diseases	Immune diseases	1	0	1	33	0.674634	0.862545	ENSG00000168685(IL7R)	-			http://www.kegg.jp/kegg-bin/show_pathway?map05340/K05072%09%23FFFFFF,red/
hsa04215	Apoptosis - multiple species	Cellular Processes	Cell growth and death	0	1	1	33	0.674634	0.862545	-	ENSG00000132906(CASP9)			http://www.kegg.jp/kegg-bin/show_pathway?map04215/K04399%09%23FFFFFF,green/
hsa04625	C-type lectin receptor signaling pathway	Organismal Systems	Immune system	0	3	3	104	0.680223	0.865738	-	ENSG00000136244(IL6),ENSG00000169885(CALML6),ENSG00000101096(NFATC2)			http://www.kegg.jp/kegg-bin/show_pathway?map04625/K05405%09%23FFFFFF,green/K17332%09%23FFFFFF,green/K02183%09%23FFFFFF,green/
hsa00040	Pentose and glucuronate interconversions	Metabolism	Carbohydrate metabolism	1	0	1	34	0.685532	0.868547	ENSG00000085662(AKR1B1)	-			http://www.kegg.jp/kegg-bin/show_pathway?map00040/K00011%09%23FFFFFF,red/
hsa04723	Retrograde endocannabinoid signaling	Organismal Systems	Nervous system	3	1	4	140	0.692698	0.87347	ENSG00000102287(GABRE),ENSG00000157388(CACNA1D),ENSG00000154229(PRKCA)	ENSG00000185633(NDUFA4L2)			http://www.kegg.jp/kegg-bin/show_pathway?map04723/K04851%09%23FFFFFF,red/K05185%09%23FFFFFF,red/K03948%09%23FFFFFF,green/K02677%09%23FFFFFF,red/
hsa05218	Melanoma	Human Diseases	Cancers: Specific types	0	2	2	72	0.698776	0.87347	-	ENSG00000099860(GADD45B),ENSG00000116717(GADD45A)			http://www.kegg.jp/kegg-bin/show_pathway?map05218/K04402%09%23FFFFFF,green/
hsa03320	PPAR signaling pathway	Organismal Systems	Endocrine system	1	1	2	72	0.698776	0.87347	ENSG00000155368(DBI)	ENSG00000100889(PCK2)			http://www.kegg.jp/kegg-bin/show_pathway?map03320/K08762%09%23FFFFFF,red/K01596%09%23FFFFFF,green/
hsa00562	Inositol phosphate metabolism	Metabolism	Carbohydrate metabolism	0	2	2	74	0.713058	0.887362	-	ENSG00000078142(PIK3C3),ENSG00000102043(MTMR8)			http://www.kegg.jp/kegg-bin/show_pathway?map00562/K18083%09%23FFFFFF,green/K00914%09%23FFFFFF,green/
hsa05220	Chronic myeloid leukemia	Human Diseases	Cancers: Specific types	0	2	2	75	0.719985	0.892016	-	ENSG00000099860(GADD45B),ENSG00000116717(GADD45A)			http://www.kegg.jp/kegg-bin/show_pathway?map05220/K04402%09%23FFFFFF,green/
hsa05224	Breast cancer	Human Diseases	Cancers: Specific types	1	3	4	147	0.728576	0.898684	ENSG00000074181(NOTCH3)	ENSG00000099860(GADD45B),ENSG00000138795(LEF1),ENSG00000116717(GADD45A)			http://www.kegg.jp/kegg-bin/show_pathway?map05224/K04492%09%23FFFFFF,green/K20995%09%23FFFFFF,red/K04402%09%23FFFFFF,green/
hsa04975	Fat digestion and absorption	Organismal Systems	Digestive system	1	0	1	39	0.734794	0.902379	ENSG00000165029(ABCA1)	-			http://www.kegg.jp/kegg-bin/show_pathway?map04975/K05641%09%23FFFFFF,red/
hsa05033	Nicotine addiction	Human Diseases	Substance dependence	1	0	1	40	0.743681	0.909305	ENSG00000102287(GABRE)	-			http://www.kegg.jp/kegg-bin/show_pathway?map05033/K05185%09%23FFFFFF,red/
hsa05219	Bladder cancer	Human Diseases	Cancers: Specific types	0	1	1	41	0.752271	0.915808	-	ENSG00000112715(VEGFA)			http://www.kegg.jp/kegg-bin/show_pathway?map05219/K05448%09%23FFFFFF,green/
hsa04934	Cushing's syndrome	Human Diseases	Endocrine and metabolic diseases	2	2	4	153	0.756765	0.917291	ENSG00000185630(PBX1),ENSG00000157388(CACNA1D)	ENSG00000146592(CREB5),ENSG00000138795(LEF1)			http://www.kegg.jp/kegg-bin/show_pathway?map04934/K04851%09%23FFFFFF,red/K04492%09%23FFFFFF,green/K09355%09%23FFFFFF,red/K09047%09%23FFFFFF,green/
hsa00860	Porphyrin and chlorophyll metabolism	Metabolism	Metabolism of cofactors and vitamins	1	0	1	42	0.760573	0.917933	ENSG00000100292(HMOX1)	-			http://www.kegg.jp/kegg-bin/show_pathway?map00860/K00510%09%23FFFFFF,red/
hsa00190	Oxidative phosphorylation	Metabolism	Energy metabolism	1	2	3	120	0.769544	0.924774	ENSG00000126267(COX6B1)	ENSG00000160471(COX6B2),ENSG00000185633(NDUFA4L2)			http://www.kegg.jp/kegg-bin/show_pathway?map00190/K02267%09%23FFFFFF,purple/K03948%09%23FFFFFF,green/
hsa04114	Oocyte meiosis	Cellular Processes	Cell growth and death	1	2	3	121	0.774384	0.925018	ENSG00000166851(PLK1)	ENSG00000107864(CPEB3),ENSG00000169885(CALML6)			http://www.kegg.jp/kegg-bin/show_pathway?map04114/K02183%09%23FFFFFF,green/K06631%09%23FFFFFF,red/K02602%09%23FFFFFF,green/
hsa04962	Vasopressin-regulated water reabsorption	Organismal Systems	Excretory system	0	1	1	44	0.776355	0.925018	-	ENSG00000146592(CREB5)			http://www.kegg.jp/kegg-bin/show_pathway?map04962/K09047%09%23FFFFFF,green/
hsa05323	Rheumatoid arthritis	Human Diseases	Immune diseases	0	2	2	85	0.781771	0.927525	-	ENSG00000136244(IL6),ENSG00000112715(VEGFA)			http://www.kegg.jp/kegg-bin/show_pathway?map05323/K05405%09%23FFFFFF,green/K05448%09%23FFFFFF,green/
hsa04672	Intestinal immune network for IgA production	Organismal Systems	Immune system	0	1	1	46	0.791098	0.930957	-	ENSG00000136244(IL6)			http://www.kegg.jp/kegg-bin/show_pathway?map04672/K05405%09%23FFFFFF,green/
hsa04630	Jak-STAT signaling pathway	Environmental Information Processing	Signal transduction	1	3	4	162	0.79474	0.930957	ENSG00000168685(IL7R)	ENSG00000136244(IL6),ENSG00000174564(IL20RB),ENSG00000198223(CSF2RA)			http://www.kegg.jp/kegg-bin/show_pathway?map04630/K05405%09%23FFFFFF,green/K05072%09%23FFFFFF,red/K05066%09%23FFFFFF,green/K05137%09%23FFFFFF,green/
hsa04080	Neuroactive ligand-receptor interaction	Environmental Information Processing	Signaling molecules and interaction	4	4	8	304	0.801284	0.930957	ENSG00000065325(GLP2R),ENSG00000181104(F2R),ENSG00000102287(GABRE),ENSG00000164251(F2RL1)	ENSG00000158748(HTR6),ENSG00000101188(NTSR1),ENSG00000133019(CHRM3),ENSG00000135346(CGA)			http://www.kegg.jp/kegg-bin/show_pathway?map04080/K04162%09%23FFFFFF,green/K04131%09%23FFFFFF,green/K05185%09%23FFFFFF,red/K04211%09%23FFFFFF,green/K03914%09%23FFFFFF,red/K04234%09%23FFFFFF,red/K04582%09%23FFFFFF,red/K08522%09%23FFFFFF,green/
hsa00280	Valine, leucine and isoleucine degradation	Metabolism	Amino acid metabolism	1	0	1	48	0.804871	0.930957	ENSG00000137124(ALDH1B1)	-			http://www.kegg.jp/kegg-bin/show_pathway?map00280/K00128%09%23FFFFFF,red/
hsa05144	Malaria	Human Diseases	Infectious diseases: Parasitic	0	1	1	48	0.804871	0.930957	-	ENSG00000136244(IL6)			http://www.kegg.jp/kegg-bin/show_pathway?map05144/K05405%09%23FFFFFF,green/
hsa04140	Autophagy - animal	Cellular Processes	Transport and catabolism	1	2	3	128	0.805969	0.930957	ENSG00000117984(CTSD)	ENSG00000078142(PIK3C3),ENSG00000185950(IRS2)			http://www.kegg.jp/kegg-bin/show_pathway?map04140/K07187%09%23FFFFFF,green/K01379%09%23FFFFFF,red/K00914%09%23FFFFFF,green/
hsa04658	Th1 and Th2 cell differentiation	Organismal Systems	Immune system	1	1	2	90	0.807938	0.930957	ENSG00000074181(NOTCH3)	ENSG00000101096(NFATC2)			http://www.kegg.jp/kegg-bin/show_pathway?map04658/K17332%09%23FFFFFF,green/K20995%09%23FFFFFF,red/
hsa05322	Systemic lupus erythematosus	Human Diseases	Immune diseases	2	1	3	130	0.814281	0.934421	ENSG00000182326(C1S),ENSG00000159403(C1R)	ENSG00000180573(HIST1H2AC)			http://www.kegg.jp/kegg-bin/show_pathway?map05322/K01330%09%23FFFFFF,red/K11251%09%23FFFFFF,green/K01331%09%23FFFFFF,red/
hsa05320	Autoimmune thyroid disease	Human Diseases	Immune diseases	0	1	1	50	0.817738	0.934558	-	ENSG00000135346(CGA)			http://www.kegg.jp/kegg-bin/show_pathway?map05320/K08522%09%23FFFFFF,green/
hsa03460	Fanconi anemia pathway	Genetic Information Processing	Replication and repair	1	0	1	54	0.840988	0.953389	ENSG00000169689(CENPX)	-			http://www.kegg.jp/kegg-bin/show_pathway?map03460/K15360%09%23FFFFFF,red/
hsa05034	Alcoholism	Human Diseases	Substance dependence	1	3	4	178	0.850367	0.953389	ENSG00000069535(MAOB)	ENSG00000180573(HIST1H2AC),ENSG00000169885(CALML6),ENSG00000146592(CREB5)			http://www.kegg.jp/kegg-bin/show_pathway?map05034/K11251%09%23FFFFFF,green/K02183%09%23FFFFFF,green/K09047%09%23FFFFFF,green/K00274%09%23FFFFFF,red/
hsa04660	T cell receptor signaling pathway	Organismal Systems	Immune system	0	2	2	100	0.852029	0.953389	-	ENSG00000010810(FYN),ENSG00000101096(NFATC2)			http://www.kegg.jp/kegg-bin/show_pathway?map04660/K17332%09%23FFFFFF,green/K05703%09%23FFFFFF,green/
hsa05166	HTLV-I infection	Human Diseases	Infectious diseases: Viral	2	3	5	216	0.852538	0.953389	ENSG00000137673(MMP7),ENSG00000213585(VDAC1)	ENSG00000136244(IL6),ENSG00000146592(CREB5),ENSG00000101096(NFATC2)			http://www.kegg.jp/kegg-bin/show_pathway?map05166/K05862%09%23FFFFFF,red/K05405%09%23FFFFFF,green/K17332%09%23FFFFFF,green/K01397%09%23FFFFFF,red/K09047%09%23FFFFFF,green/
hsa05168	Herpes simplex infection	Human Diseases	Infectious diseases: Viral	0	4	4	180	0.856335	0.953389	-	ENSG00000132326(PER2),ENSG00000136244(IL6),ENSG00000157873(TNFRSF14),ENSG00000049246(PER3)			http://www.kegg.jp/kegg-bin/show_pathway?map05168/K05152%09%23FFFFFF,green/K05405%09%23FFFFFF,green/K21945%09%23FFFFFF,green/K02633%09%23FFFFFF,green/
hsa00240	Pyrimidine metabolism	Metabolism	Nucleotide metabolism	1	0	1	57	0.856461	0.953389	ENSG00000158825(CDA)	-			http://www.kegg.jp/kegg-bin/show_pathway?map00240/K01489%09%23FFFFFF,red/
hsa04514	Cell adhesion molecules (CAMs)	Environmental Information Processing	Signaling molecules and interaction	1	2	3	142	0.85805	0.953389	ENSG00000110876(SELPLG)	ENSG00000163347(CLDN1),ENSG00000181885(CLDN7)			http://www.kegg.jp/kegg-bin/show_pathway?map04514/K06087%09%23FFFFFF,green/K06544%09%23FFFFFF,red/
hsa04730	Long-term depression	Organismal Systems	Nervous system	1	0	1	59	0.865932	0.958344	ENSG00000154229(PRKCA)	-			http://www.kegg.jp/kegg-bin/show_pathway?map04730/K02677%09%23FFFFFF,red/
hsa05226	Gastric cancer	Human Diseases	Cancers: Specific types	0	3	3	147	0.87345	0.962858	-	ENSG00000099860(GADD45B),ENSG00000138795(LEF1),ENSG00000116717(GADD45A)			http://www.kegg.jp/kegg-bin/show_pathway?map05226/K04492%09%23FFFFFF,green/K04402%09%23FFFFFF,green/
hsa04150	mTOR signaling pathway	Environmental Information Processing	Signal transduction	1	2	3	151	0.884688	0.966568	ENSG00000154229(PRKCA)	ENSG00000187840(EIF4EBP1),ENSG00000130766(SESN2)			http://www.kegg.jp/kegg-bin/show_pathway?map04150/K07205%09%23FFFFFF,green/K20394%09%23FFFFFF,green/K02677%09%23FFFFFF,red/
hsa04137	Mitophagy - animal	Cellular Processes	Transport and catabolism	0	1	1	65	0.890766	0.966568	-	ENSG00000164442(CITED2)			http://www.kegg.jp/kegg-bin/show_pathway?map04137/K21361%09%23FFFFFF,green/
hsa00830	Retinol metabolism	Metabolism	Metabolism of cofactors and vitamins	1	0	1	66	0.894433	0.966568	ENSG00000186684(CYP27C1)	-			http://www.kegg.jp/kegg-bin/show_pathway?map00830/K17951%09%23FFFFFF,red/
hsa05160	Hepatitis C	Human Diseases	Infectious diseases: Viral	0	3	3	155	0.895028	0.966568	-	ENSG00000163347(CLDN1),ENSG00000181885(CLDN7),ENSG00000132906(CASP9)			http://www.kegg.jp/kegg-bin/show_pathway?map05160/K06087%09%23FFFFFF,green/K04399%09%23FFFFFF,green/
hsa05211	Renal cell carcinoma	Human Diseases	Cancers: Specific types	0	1	1	69	0.904714	0.966568	-	ENSG00000112715(VEGFA)			http://www.kegg.jp/kegg-bin/show_pathway?map05211/K05448%09%23FFFFFF,green/
hsa04662	B cell receptor signaling pathway	Organismal Systems	Immune system	0	1	1	69	0.904714	0.966568	-	ENSG00000101096(NFATC2)			http://www.kegg.jp/kegg-bin/show_pathway?map04662/K17332%09%23FFFFFF,green/
hsa05203	Viral carcinogenesis	Human Diseases	Cancers: Overview	3	1	4	200	0.905635	0.966568	ENSG00000067225(PKM),ENSG00000006747(SCIN),ENSG00000148180(GSN)	ENSG00000146592(CREB5)			http://www.kegg.jp/kegg-bin/show_pathway?map05203/K05768%09%23FFFFFF,red/K09047%09%23FFFFFF,green/K00873%09%23FFFFFF,red/
hsa04917	Prolactin signaling pathway	Organismal Systems	Endocrine system	0	1	1	70	0.907914	0.966568	-	ENSG00000135346(CGA)			http://www.kegg.jp/kegg-bin/show_pathway?map04917/K08522%09%23FFFFFF,green/
hsa05140	Leishmaniasis	Human Diseases	Infectious diseases: Parasitic	1	0	1	70	0.907914	0.966568	ENSG00000175130(MARCKSL1)	-			http://www.kegg.jp/kegg-bin/show_pathway?map05140/K13536%09%23FFFFFF,red/
hsa04722	Neurotrophin signaling pathway	Organismal Systems	Nervous system	1	1	2	119	0.911336	0.966568	ENSG00000179222(MAGED1)	ENSG00000169885(CALML6)			http://www.kegg.jp/kegg-bin/show_pathway?map04722/K12464%09%23FFFFFF,red/K02183%09%23FFFFFF,green/
hsa04380	Osteoclast differentiation	Organismal Systems	Development	0	2	2	125	0.924866	0.971114	-	ENSG00000010810(FYN),ENSG00000101096(NFATC2)			http://www.kegg.jp/kegg-bin/show_pathway?map04380/K17332%09%23FFFFFF,green/K05703%09%23FFFFFF,green/
hsa03008	Ribosome biogenesis in eukaryotes	Genetic Information Processing	Translation	1	0	1	77	0.927505	0.971114	ENSG00000104356(POP1)	-			http://www.kegg.jp/kegg-bin/show_pathway?map03008/K01164%09%23FFFFFF,red/
hsa00230	Purine metabolism	Metabolism	Nucleotide metabolism	1	1	2	128	0.930878	0.971114	ENSG00000067225(PKM)	ENSG00000152270(PDE3B)			http://www.kegg.jp/kegg-bin/show_pathway?map00230/K13296%09%23FFFFFF,green/K00873%09%23FFFFFF,red/
hsa03018	RNA degradation	Genetic Information Processing	Folding, sorting and degradation	0	1	1	79	0.932295	0.971114	-	ENSG00000101104(PABPC1L)			http://www.kegg.jp/kegg-bin/show_pathway?map03018/K13126%09%23FFFFFF,green/
hsa04742	Taste transduction	Organismal Systems	Sensory system	0	1	1	80	0.934571	0.971114	-	ENSG00000133019(CHRM3)			http://www.kegg.jp/kegg-bin/show_pathway?map04742/K04131%09%23FFFFFF,green/
hsa04146	Peroxisome	Cellular Processes	Transport and catabolism	1	0	1	82	0.938896	0.971114	ENSG00000121691(CAT)	-			http://www.kegg.jp/kegg-bin/show_pathway?map04146/K03781%09%23FFFFFF,red/
hsa03040	Spliceosome	Genetic Information Processing	Transcription	2	0	2	133	0.9399	0.971114	ENSG00000204388(HSPA1B),ENSG00000109971(HSPA8)	-			http://www.kegg.jp/kegg-bin/show_pathway?map03040/K03283%09%23FFFFFF,red/
hsa04120	Ubiquitin mediated proteolysis	Genetic Information Processing	Folding, sorting and degradation	1	1	2	136	0.944764	0.972552	ENSG00000138641(HERC3)	ENSG00000069869(NEDD4)			http://www.kegg.jp/kegg-bin/show_pathway?map04120/K10614%09%23FFFFFF,red/K10591%09%23FFFFFF,green/
hsa04064	NF-kappa B signaling pathway	Environmental Information Processing	Signal transduction	0	1	1	89	0.951905	0.976001	-	ENSG00000118503(TNFAIP3)			http://www.kegg.jp/kegg-bin/show_pathway?map04064/K11859%09%23FFFFFF,green/
hsa03015	mRNA surveillance pathway	Genetic Information Processing	Translation	0	1	1	91	0.955086	0.976001	-	ENSG00000101104(PABPC1L)			http://www.kegg.jp/kegg-bin/show_pathway?map03015/K13126%09%23FFFFFF,green/
hsa01522	Endocrine resistance	Human Diseases	Drug resistance: Antineoplastic	1	0	1	96	0.96215	0.979644	ENSG00000074181(NOTCH3)	-			http://www.kegg.jp/kegg-bin/show_pathway?map01522/K20995%09%23FFFFFF,red/
hsa05142	Chagas disease (American trypanosomiasis)	Human Diseases	Infectious diseases: Parasitic	0	1	1	100	0.966994	0.979675	-	ENSG00000136244(IL6)			http://www.kegg.jp/kegg-bin/show_pathway?map05142/K05405%09%23FFFFFF,green/
hsa04620	Toll-like receptor signaling pathway	Organismal Systems	Immune system	0	1	1	102	0.969179	0.979675	-	ENSG00000136244(IL6)			http://www.kegg.jp/kegg-bin/show_pathway?map04620/K05405%09%23FFFFFF,green/
hsa04062	Chemokine signaling pathway	Organismal Systems	Immune system	1	1	2	188	0.987809	0.992898	ENSG00000163739(CXCL1)	ENSG00000081041(CXCL2)			http://www.kegg.jp/kegg-bin/show_pathway?map04062/K05505%09%23FFFFFF,purple/
hsa03010	Ribosome	Genetic Information Processing	Translation	1	0	1	133	0.989352	0.992898	ENSG00000185088(RPS27L)	-			http://www.kegg.jp/kegg-bin/show_pathway?map03010/K02978%09%23FFFFFF,red/
hsa04740	Olfactory transduction	Organismal Systems	Sensory system	1	2	3	425	0.999945	0.999945	ENSG00000144191(CNGA3)	ENSG00000047617(ANO2),ENSG00000169885(CALML6)			http://www.kegg.jp/kegg-bin/show_pathway?map04740/K02183%09%23FFFFFF,green/K19497%09%23FFFFFF,green/K04950%09%23FFFFFF,red/
